# Supplementary material for: Mental Health Care Utilization and Prescription Rates Among Children, Adolescents, and Young Adults in France
Source: PubMed Central journal article supplement (PMC11707635; doi:10.1001/jamanetworkopen.2024.52789), 2025-01-07
Supplement: jamanetwopen-e2452789-s001.pdf [file jamanetwopen-e2452789-s001.pdf]

## Supplemental Online Content

Fond G, Pauly V, Brousse Y, et al. Mental Health Care Utilization and Prescription Rates Among Children, Adolescents, and Young Adults in France. *JAMA Netw Open*. 2024;7(12):e2452789. doi:10.1001/jamanetworkopen.2024.52789

**eAppendix.** Anatomical Therapeutic Chemical (ATC) Classification

**eTable 1.** Mental Health Care and Prescription Trends Before and After the Beginning of the COVID-19 Pandemic

**eTable 2.** Relative-Risk (RR) Difference Between Annual Trends After vs Before the COVID-19 Pandemic, and Immediate Effect Estimation

**eTable 3.** Change in Prescription Rates Between 2016 and 2022 by Drug

**eFigure 1.** Sex-Specific Trends in Mental Health Care and Prescriptions Before and After the Beginning of the COVID-19 Pandemic With Annual Relative Risk

**eFigure 2.** Age-Specific Trends in Mental Health Care and Prescriptions Before and After the Beginning of the COVID-19 Pandemic With Annual Relative Risk

This supplemental material has been provided by the authors to give readers additional information about their work.

### **eAppendix. Anatomical Therapeutic Chemical (ATC) Classification**

This included antidepressants (ATC N06A, excluding bupropion N06AX12), anxiolytics (ATC N05B), hypnotics and sedatives (ATC N05C, excluding melatonin, which was only reimbursed starting from 2020), mood stabilizers (including lithium ATC N05AN, carbamazepine ATC N03AF01, valproic acid ATC N03AG01, valpromide ATC N03AG02, and lamotrigine ATC N03AX09), antipsychotics (ATC N05A, excluding lithium ATC N05AN, vernalipride ATC N05AL06, and Neuriplege® with French CIP code 3400932896332), methylphenidate (ATC N06BA04), and medications used for alcohol dependence (ATC N07BB).

**eTable 1.** Mental Health Care and Prescription Trends Before and After the Beginning of the COVID-19 Pandemic

|                                                                          | 2016               | 2017               | 2018               | 2019               | 2020               | 2021               | 2022               |
|--------------------------------------------------------------------------|--------------------|--------------------|--------------------|--------------------|--------------------|--------------------|--------------------|
| Outpatient psychiatric consultation, N<br>(rates per 1000 inhabitants)   | 267,670<br>(12.85) | 272,081<br>(13.09) | 270,410<br>(13.01) | 275,713<br>(13.30) | 265,070<br>(12.79) | 299,497<br>(14.46) | 315,272<br>(15.23) |
| Females                                                                  | 128,595<br>(12.60) | 132,839<br>(13.04) | 132,756<br>(13.05) | 136,113<br>(13.42) | 135,583<br>(13.38) | 162,608<br>(16.07) | 176,393<br>(17.46) |
| Males                                                                    | 139,080<br>(13.09) | 139,251<br>(13.13) | 137,656<br>(12.98) | 139,608<br>(13.18) | 129,493<br>(12.22) | 136,892<br>(12.92) | 138,881<br>(13.11) |
| 0 – 5 years                                                              | 29,089<br>(6.19)   | 27,417<br>(5.92)   | 25,105<br>(5.52)   | 23,891<br>(5.33)   | 20,327<br>(4.62)   | 19,720<br>(4.55)   | 17,718<br>(4.14)   |
| 6 – 12 years                                                             | 82,956<br>(14.15)  | 78,319<br>(13.32)  | 75,400<br>(12.80)  | 75,063<br>(12.81)  | 66,688<br>(11.39)  | 67,516<br>(11.61)  | 64,329<br>(11.15)  |
| 13 – 17 years                                                            | 61,560<br>(14.74)  | 60,114<br>(14.31)  | 60,535<br>(14.46)  | 61,432<br>(14.66)  | 59,388<br>(14.07)  | 70,084<br>(16.42)  | 75,228<br>(17.46)  |
| 18 – 25 years                                                            | 102,910<br>(16.89) | 114,947<br>(18.91) | 118,312<br>(19.23) | 124,374<br>(20.05) | 127,209<br>(20.32) | 152,063<br>(24.16) | 168,543<br>(26.58) |
| Psychiatric full-time hospitalization, N<br>(rates per 1000 inhabitants) | 49,334<br>(2.37)   | 50,987<br>(2.45)   | 52,949<br>(2.55)   | 53,898<br>(2.60)   | 48,605<br>(2.34)   | 57,292<br>(2.77)   | 60,982<br>(2.95)   |
| Females                                                                  | 22,823<br>(2.24)   | 24,227<br>(2.38)   | 25,583<br>(2.52)   | 26,625<br>(2.63)   | 25,563<br>(2.52)   | 32,819<br>(3.24)   | 36,149<br>(3.58)   |
| Males                                                                    | 26,515<br>(2.50)   | 26,762<br>(2.52)   | 27,368<br>(2.58)   | 27,274<br>(2.57)   | 23,043<br>(2.17)   | 24,477<br>(2.31)   | 24,835<br>(2.34)   |
| 0 – 5 years                                                              | 367<br>(0.08)      | 347<br>(0.07)      | 290<br>(0.06)      | 266<br>(0.06)      | 148<br>(0.03)      | 151<br>(0.03)      | 182<br>(0.04)      |
| 6 – 12 years                                                             | 4,232<br>(0.72)    | 4,221<br>(0.72)    | 4,125<br>(0.70)    | 4,179<br>(0.71)    | 2,942<br>(0.50)    | 3,369<br>(0.58)    | 3,799<br>(0.66)    |
| 13 – 17 years                                                            | 14,412<br>(3.45)   | 15,102<br>(3.60)   | 15,726<br>(3.76)   | 15,527<br>(3.70)   | 14,212<br>(3.37)   | 17,540<br>(4.11)   | 18,500<br>(4.29)   |
| 18 – 25 years                                                            | 30,948<br>(5.08)   | 32,024<br>(5.27)   | 33,559<br>(5.45)   | 34,616<br>(5.58)   | 32,036<br>(5.12)   | 37,054<br>(5.89)   | 39,301<br>(6.20)   |
| Suicide attempt, N<br>(rates per 1000 inhabitants)                       | 19,512<br>(0.94)   | 19,920<br>(0.96)   | 21,621<br>(1.04)   | 21,793<br>(1.05)   | 19,354<br>(0.93)   | 26,219<br>(1.27)   | 27,921<br>(1.35)   |
| Females                                                                  | 13,836<br>(1.36)   | 14,214<br>(1.39)   | 15,293<br>(1.50)   | 15,438<br>(1.52)   | 13,641<br>(1.35)   | 19,906<br>(1.97)   | 21,611<br>(2.14)   |
| Males                                                                    | 5,665<br>(0.53)    | 5,700<br>(0.54)    | 6,319<br>(0.60)    | 6,337<br>(0.60)    | 5,696<br>(0.54)    | 6,300<br>(0.59)    | 6,300<br>(0.59)    |
| 0 – 5 years                                                              | 178<br>(0.04)      | 152<br>(0.03)      | 196<br>(0.04)      | 172<br>(0.04)      | 172<br>(0.04)      | 167<br>(0.04)      | 169<br>(0.04)      |
| 6 – 12 years                                                             | 800<br>(0.14)      | 885<br>(0.15)      | 991<br>(0.17)      | 1,049<br>(0.18)    | 930<br>(0.16)      | 1,431<br>(0.25)    | 1,245<br>(0.22)    |
| 13 – 17 years                                                            | 9,165<br>(2.19)    | 9,453<br>(2.25)    | 10,342<br>(2.47)   | 9,915<br>(2.37)    | 8,503<br>(2.01)    | 13,250<br>(3.10)   | 14,122<br>(3.28)   |
| 18 – 25 years                                                            | 9,433<br>(1.55)    | 9,493<br>(1.56)    | 10,176<br>(1.65)   | 10,761<br>(1.73)   | 9,814<br>(1.57)    | 11,517<br>(1.83)   | 12,531<br>(1.98)   |
| Antidepressants, N<br>(rates per 1000 inhabitants)                       | 205,948<br>(9.89)  | 230,678<br>(11.09) | 238,912<br>(11.50) | 250,718<br>(12.09) | 261,529<br>(12.61) | 322,468<br>(15.56) | 368,822<br>(17.82) |
| Females                                                                  | 129,890<br>(12.72) | 146,072<br>(14.34) | 151,385<br>(14.88) | 159,890<br>(15.77) | 170,500<br>(16.83) | 218,039<br>(21.55) | 254,949<br>(25.23) |
| Males                                                                    | 76,059<br>(7.16)   | 84,607<br>(7.98)   | 87,531<br>(8.25)   | 90,831<br>(8.57)   | 91,037<br>(8.59)   | 104,435<br>(9.85)  | 113,877<br>(10.75) |
| 0 – 5 years                                                              | 2,480<br>(0.53)    | 2,315<br>(0.50)    | 2,161<br>(0.47)    | 2,036<br>(0.45)    | 1,785<br>(0.41)    | 1,935<br>(0.45)    | 2,219<br>(0.52)    |
| 6 – 12 years                                                             | 10,472<br>(1.79)   | 10,214<br>(1.74)   | 10,008<br>(1.70)   | 9,986<br>(1.70)    | 9,813<br>(1.68)    | 11,296<br>(1.94)   | 12,197<br>(2.11)   |
| 13 – 17 years                                                            | 39,829<br>(9.53)   | 41,110<br>(9.79)   | 44,002<br>(10.51)  | 46,581<br>(11.11)  | 49,389<br>(11.70)  | 67,085<br>(15.72)  | 80,279<br>(18.63)  |
| 18 – 25 years                                                            | 158,051<br>(25.94) | 182,110<br>(29.96) | 188,494<br>(30.63) | 198,425<br>(31.98) | 207,522<br>(33.15) | 251,397<br>(39.94) | 285,419<br>(45.02) |
| Anxiolytics, N<br>(rates per 1000 inhabitants)                           | 651,766<br>(31.29) | 679,155<br>(32.66) | 678,379<br>(32.65) | 675,703<br>(32.59) | 653,714<br>(31.53) | 727,072<br>(35.09) | 706,149<br>(34.12) |

|                                                     | 2016               | 2017               | 2018               | 2019               | 2020               | 2021               | 2022               |
|-----------------------------------------------------|--------------------|--------------------|--------------------|--------------------|--------------------|--------------------|--------------------|
| Females                                             | 399,627<br>(39.15) | 418,470<br>(41.07) | 417,192<br>(41.02) | 415,242<br>(40.94) | 407,294<br>(40.20) | 464,374<br>(45.89) | 449,255<br>(44.47) |
| Males                                               | 252,142<br>(23.74) | 260,688<br>(24.59) | 261,191<br>(24.62) | 260,464<br>(24.59) | 246,421<br>(23.25) | 262,701<br>(24.79) | 256,896<br>(24.25) |
| 0 – 5 years                                         | 56,610<br>(12.06)  | 50,071<br>(10.81)  | 48,197<br>(10.59)  | 45,811<br>(10.22)  | 33,945<br>(7.72)   | 38,783<br>(8.94)   | 43,281<br>(10.12)  |
| 6 – 12 years                                        | 62,692<br>(10.69)  | 60,582<br>(10.30)  | 60,576<br>(10.29)  | 60,008<br>(10.24)  | 56,507<br>(9.65)   | 63,474<br>(10.91)  | 65,578<br>(11.37)  |
| 13 – 17 years                                       | 129,517<br>(31.00) | 127,710<br>(30.41) | 127,638<br>(30.49) | 125,015<br>(29.83) | 120,549<br>(28.57) | 143,649<br>(33.65) | 134,475<br>(31.21) |
| 18 – 25 years                                       | 409,148<br>(67.16) | 447,076<br>(73.55) | 448,476<br>(72.88) | 451,467<br>(72.77) | 449,567<br>(71.82) | 489,301<br>(77.73) | 470,996<br>(74.28) |
| Hypnotics, N<br>(rates per 1000 inhabitants)        | 117,514<br>(5.64)  | 112,968<br>(5.43)  | 108,217<br>(5.21)  | 104,828<br>(5.06)  | 101,982<br>(4.92)  | 105,877<br>(5.11)  | 114,296<br>(5.52)  |
| Females                                             | 68,212<br>(6.68)   | 64,156<br>(6.30)   | 60,327<br>(5.93)   | 57,850<br>(5.70)   | 56,549<br>(5.58)   | 60,444<br>(5.97)   | 64,974<br>(6.43)   |
| Males                                               | 49,303<br>(4.64)   | 48,813<br>(4.60)   | 47,891<br>(4.51)   | 46,979<br>(4.43)   | 45,434<br>(4.29)   | 45,433<br>(4.29)   | 49,322<br>(4.66)   |
| 0 – 5 years                                         | 7,911<br>(1.68)    | 8,853<br>(1.91)    | 9,716<br>(2.14)    | 10,238<br>(2.28)   | 9,453<br>(2.15)    | 9,982<br>(2.30)    | 13,016<br>(3.04)   |
| 6 – 12 years                                        | 8,627<br>(1.47)    | 9,825<br>(1.67)    | 11,098<br>(1.88)   | 11,559<br>(1.97)   | 12,332<br>(2.11)   | 11,482<br>(1.97)   | 13,633<br>(2.36)   |
| 13 – 17 years                                       | 13,897<br>(3.33)   | 12,600<br>(3.00)   | 12,649<br>(3.02)   | 12,337<br>(2.94)   | 12,214<br>(2.89)   | 12,750<br>(2.99)   | 14,049<br>(3.26)   |
| 18 – 25 years                                       | 88,008<br>(14.45)  | 82,520<br>(13.58)  | 75,689<br>(12.30)  | 71,613<br>(11.54)  | 68,973<br>(11.02)  | 72,552<br>(11.53)  | 74,614<br>(11.77)  |
| Mood stabilizers, N<br>(rates per 1000 inhabitants) | 77,174<br>(3.71)   | 78,607<br>(3.78)   | 77,894<br>(3.75)   | 78,164<br>(3.77)   | 77,730<br>(3.75)   | 80,710<br>(3.90)   | 84,175<br>(4.07)   |
| Females                                             | 35,051<br>(3.43)   | 35,206<br>(3.46)   | 34,829<br>(3.42)   | 35,368<br>(3.49)   | 35,872<br>(3.54)   | 38,333<br>(3.79)   | 41,486<br>(4.11)   |
| Males                                               | 42,126<br>(3.97)   | 43,404<br>(4.09)   | 43,072<br>(4.06)   | 42,798<br>(4.04)   | 41,860<br>(3.95)   | 42,378<br>(4.00)   | 42,689<br>(4.03)   |
| 0 – 5 years                                         | 10,090<br>(2.15)   | 8,979<br>(1.94)    | 8,387<br>(1.84)    | 7,885<br>(1.76)    | 7,297<br>(1.66)    | 7,014<br>(1.62)    | 7,213<br>(1.69)    |
| 6 – 12 years                                        | 17,243<br>(2.94)   | 16,409<br>(2.79)   | 16,021<br>(2.72)   | 15,863<br>(2.71)   | 15,379<br>(2.63)   | 14,898<br>(2.56)   | 14,711<br>(2.55)   |
| 13 – 17 years                                       | 18,059<br>(4.32)   | 17,499<br>(4.17)   | 17,199<br>(4.11)   | 17,030<br>(4.06)   | 16,754<br>(3.97)   | 17,200<br>(4.03)   | 17,878<br>(4.15)   |
| 18 – 25 years                                       | 37,130<br>(6.09)   | 41,125<br>(6.77)   | 41,597<br>(6.76)   | 42,674<br>(6.88)   | 43,553<br>(6.96)   | 46,685<br>(7.42)   | 49,656<br>(7.83)   |
| Antipsychotics, N<br>(rates per 1000 inhabitants)   | 118,633<br>(5.70)  | 129,801<br>(6.24)  | 135,365<br>(6.51)  | 141,563<br>(6.83)  | 145,809<br>(7.03)  | 164,849<br>(7.96)  | 180,096<br>(8.70)  |
| Females                                             | 39,885<br>(3.91)   | 44,438<br>(4.36)   | 47,576<br>(4.68)   | 50,779<br>(5.01)   | 55,105<br>(5.44)   | 69,168<br>(6.83)   | 81,011<br>(8.02)   |
| Males                                               | 78,751<br>(7.41)   | 85,368<br>(8.05)   | 87,793<br>(8.28)   | 90,788<br>(8.57)   | 90,706<br>(8.56)   | 95,683<br>(9.03)   | 99,088<br>(9.35)   |
| 0 – 5 years                                         | 2,435<br>(0.52)    | 2,452<br>(0.53)    | 2,463<br>(0.54)    | 2,444<br>(0.55)    | 2,440<br>(0.55)    | 2,750<br>(0.63)    | 2,831<br>(0.66)    |
| 6 – 12 years                                        | 22,286<br>(3.80)   | 22,984<br>(3.91)   | 24,078<br>(4.09)   | 25,608<br>(4.37)   | 26,274<br>(4.49)   | 28,910<br>(4.97)   | 30,486<br>(5.28)   |
| 13 – 17 years                                       | 36,072<br>(8.63)   | 37,051<br>(8.82)   | 38,943<br>(9.30)   | 40,760<br>(9.72)   | 41,815<br>(9.91)   | 49,842<br>(11.68)  | 55,306<br>(12.83)  |
| 18 – 25 years                                       | 64,265<br>(10.55)  | 73,917<br>(12.16)  | 77,011<br>(12.51)  | 80,159<br>(12.92)  | 83,014<br>(13.26)  | 92,076<br>(14.63)  | 100,871<br>(15.91) |
| Methylphenidate, N<br>(rates per 1000 inhabitants)  | 64,893<br>(3.12)   | 70,605<br>(3.40)   | 75,989<br>(3.66)   | 82,614<br>(3.98)   | 85,653<br>(4.13)   | 98,354<br>(4.75)   | 116,123<br>(5.61)  |
| Females                                             | 12,840<br>(1.26)   | 14,197<br>(1.39)   | 15,491<br>(1.52)   | 17,139<br>(1.69)   | 17,987<br>(1.78)   | 21,776<br>(2.15)   | 27,975<br>(2.77)   |
| Males                                               | 52,056<br>(4.90)   | 56,413<br>(5.32)   | 60,500<br>(5.70)   | 65,478<br>(6.18)   | 67,669<br>(6.38)   | 76,583<br>(7.23)   | 88,149<br>(8.32)   |
| 0 – 5 years                                         | 909<br>(0.19)      | 1,004<br>(0.22)    | 985<br>(0.22)      | 1,074<br>(0.24)    | 1,016<br>(0.23)    | 1,225<br>(0.28)    | 1,342<br>(0.31)    |

|                                                                     | 2016             | 2017             | 2018             | 2019             | 2020             | 2021              | 2022              |
|---------------------------------------------------------------------|------------------|------------------|------------------|------------------|------------------|-------------------|-------------------|
| 6 – 12 years                                                        | 39,647<br>(6.76) | 42,663<br>(7.25) | 45,401<br>(7.71) | 49,319<br>(8.42) | 50,692<br>(8.66) | 58,171<br>(10.00) | 66,661<br>(11.55) |
| 13 – 17 years                                                       | 23,728<br>(5.68) | 25,773<br>(6.14) | 28,069<br>(6.70) | 30,457<br>(7.27) | 31,475<br>(7.46) | 35,258<br>(8.26)  | 40,988<br>(9.51)  |
| 18 – 25 years                                                       | 6,163<br>(1.01)  | 7,205<br>(1.19)  | 8,074<br>(1.31)  | 8,931<br>(1.44)  | 9,806<br>(1.57)  | 12,166<br>(1.93)  | 16,793<br>(2.65)  |
| Drugs used in alcohol dependence, N<br>(rates per 1000 inhabitants) | 2,754<br>(0.13)  | 2,987<br>(0.14)  | 2,923<br>(0.14)  | 2,946<br>(0.14)  | 2,859<br>(0.14)  | 3,019<br>(0.15)   | 3,291<br>(0.16)   |
| Females                                                             | 754<br>(0.07)    | 854<br>(0.08)    | 840<br>(0.08)    | 905<br>(0.09)    | 896<br>(0.09)    | 977<br>(0.10)     | 1,169<br>(0.12)   |
| Males                                                               | 2,000<br>(0.19)  | 2,133<br>(0.20)  | 2,083<br>(0.20)  | 2,041<br>(0.19)  | 1,963<br>(0.19)  | 2,042<br>(0.19)   | 2,122<br>(0.20)   |
| 0 – 5 years                                                         | NA               | NA               | NA               | NA               | NA               | NA                | NA                |
| 6 – 12 years                                                        | NA               | NA               | NA               | NA               | NA               | NA                | NA                |
| 13 – 17 years                                                       | 122<br>(0.03)    | 112<br>(0.03)    | 108<br>(0.03)    | 116<br>(0.03)    | 97<br>(0.02)     | 91<br>(0.02)      | 97<br>(0.02)      |
| 18 – 25 years                                                       | 2,590<br>(0.43)  | 2,827<br>(0.47)  | 2,791<br>(0.45)  | 2,789<br>(0.45)  | 2,736<br>(0.44)  | 2,904<br>(0.46)   | 3,162<br>(0.50)   |

NA: not applicable

**eTable 2.** Relative-Risk (RR) Difference Between Annual Trends After vs Before the COVID-19 Pandemic, and Immediate Effect Estimation

|                                       | Immediate effect<br>RR [95% CI] | p-value          | Annual trends before<br>the pandemic,<br>RR [95% CI] (1) | p-value          | Annual trends after<br>the pandemic,<br>RR [95% CI] (2) | p-value          | RR diff (2) vs (1)<br>[95% CI] | p-value          |
|---------------------------------------|---------------------------------|------------------|----------------------------------------------------------|------------------|---------------------------------------------------------|------------------|--------------------------------|------------------|
| Outpatient psychiatric consultation   | 0.95<br>[0.86 – 1.05]           | 0.326            | 1.00<br>[0.99 – 1.02]                                    | 0.256            | 1.11<br>[1.06 – 1.17]                                   | <b>&lt;0.001</b> | 1.10<br>[1.04 – 1.17]          | <b>&lt;0.001</b> |
| Females                               | 0.99<br>[0.89 – 1.09]           | 0.817            | 1.02<br>[1.00 – 1.03]                                    | <b>&lt;0.001</b> | 1.16<br>[1.10 – 1.22]                                   | <b>&lt;0.001</b> | 1.13<br>[1.07 – 1.20]          | <b>&lt;0.001</b> |
| Males                                 | 0.92<br>[0.82 – 1.02]           | 0.099            | 0.99<br>[0.97 – 1.00]                                    | 0.342            | 1.05<br>[0.99 – 1.11]                                   | 0.061            | 1.06<br>[0.99 – 1.12]          | 0.067            |
| 0 – 5 years                           | 0.88<br>[0.74 – 1.05]           | 0.156            | 0.93<br>[0.91 – 0.96]                                    | <b>&lt;0.001</b> | 0.95<br>[0.87 – 1.04]                                   | 0.333            | 1.02<br>[0.91 – 1.13]          | 0.704            |
| 6 – 12 years                          | 0.90<br>[0.78 – 1.04]           | 0.157            | 0.95<br>[0.93 – 0.97]                                    | <b>&lt;0.001</b> | 1.00<br>[0.93 – 1.08]                                   | 0.873            | 1.05<br>[0.97 – 1.14]          | 0.200            |
| 13 – 17 years                         | 0.97<br>[0.85 – 1.11]           | 0.642            | 0.99<br>[0.97 – 1.01]                                    | 0.442            | 1.14<br>[1.06 – 1.21]                                   | <b>&lt;0.001</b> | 1.15<br>[1.06 – 1.23]          | <b>&lt;0.001</b> |
| 18 – 25 years                         | 0.98<br>[0.91 – 1.05]           | 0.538            | 1.05<br>[1.03 – 1.07]                                    | <b>&lt;0.001</b> | 1.14<br>[1.10 – 1.19]                                   | <b>&lt;0.001</b> | 1.08<br>[1.03 – 1.14]          | <b>&lt;0.001</b> |
| Psychiatric full-time hospitalization | 0.88<br>[0.79 – 0.97]           | <b>0.013</b>     | 1.01<br>[1.00 – 1.03]                                    | <b>0.016</b>     | 1.10<br>[1.04 – 1.16]                                   | <b>&lt;0.001</b> | 1.08<br>[1.02 – 1.15]          | <b>0.009</b>     |
| Females                               | 0.93<br>[0.83 – 1.06]           | 0.277            | 1.04<br>[1.03 – 1.05]                                    | <b>&lt;0.001</b> | 1.15<br>[1.07 – 1.22]                                   | <b>&lt;0.001</b> | 1.09<br>[1.02 – 1.18]          | <b>0.010</b>     |
| Males                                 | 0.83<br>[0.76 – 0.90]           | <b>&lt;0.001</b> | 0.99<br>[0.97 – 1.00]                                    | 0.260            | 1.04<br>[1.00 – 1.09]                                   | <b>0.033</b>     | 1.05<br>[1.00 – 1.11]          | <b>0.040</b>     |
| 0 – 5 years                           | 0.57<br>[0.35 – 0.93]           | <b>0.025</b>     | 0.89<br>[0.84 – 0.95]                                    | <b>&lt;0.001</b> | 1.22<br>[0.98 – 1.52]                                   | 0.064            | 1.36<br>[1.08 – 1.73]          | <b>0.008</b>     |
| 6 – 12 years                          | 0.75<br>[0.58 – 0.98]           | <b>0.036</b>     | 0.98<br>[0.95 – 1.01]                                    | 0.283            | 1.12<br>[1.00 – 1.27]                                   | <b>0.046</b>     | 1.14<br>[1.00 – 1.31]          | <b>0.037</b>     |
| 13 – 17 years                         | 0.90<br>[0.77 – 1.04]           | 0.162            | 1.00<br>[0.99 – 1.02]                                    | 0.258            | 1.10<br>[1.01 – 1.19]                                   | <b>0.014</b>     | 1.09<br>[1.00 – 1.19]          | <b>0.044</b>     |
| 18 – 25 years                         | 0.89<br>[0.83 – 0.95]           | <b>&lt;0.001</b> | 1.01<br>[1.00 – 1.03]                                    | <b>0.007</b>     | 1.09<br>[1.05 – 1.13]                                   | <b>&lt;0.001</b> | 1.07<br>[1.02 – 1.12]          | <b>0.003</b>     |
| Hospitalization for suicide attempt   | 0.94<br>[0.81 – 1.11]           | 0.479            | 1.03<br>[1.01 – 1.05]                                    | <b>&lt;0.001</b> | 1.15<br>[1.06 – 1.24]                                   | <b>&lt;0.001</b> | 1.11<br>[1.01 – 1.21]          | <b>0.027</b>     |
| Females                               | 0.96<br>[0.79 – 1.16]           | 0.676            | 1.03<br>[1.01 – 1.05]                                    | <b>0.002</b>     | 1.18<br>[1.08 – 1.30]                                   | <b>&lt;0.001</b> | 1.14<br>[1.02 – 1.27]          | <b>0.013</b>     |
| Males                                 | 0.91<br>[0.85 – 0.99]           | <b>0.022</b>     | 1.03<br>[1.01 – 1.05]                                    | <b>&lt;0.001</b> | 1.03<br>[0.99 – 1.08]                                   | 0.107            | 0.99<br>[0.94 – 1.05]          | 0.978            |
| 0 – 5 years                           | 0.97<br>[0.80 – 1.17]           | 0.765            | 1.02<br>[0.96 – 1.09]                                    | 0.385            | 1.01<br>[0.93 – 1.09]                                   | 0.737            | 0.98<br>[0.89 – 1.08]          | 0.748            |

|                 | Immediate effect<br>RR [95% CI] | p-value          | Annual trends before<br>the pandemic,<br>RR [95% CI] (1) | p-value          | Annual trends after<br>the pandemic,<br>RR [95% CI] (2) | p-value          | RR diff (2) vs (1)<br>[95% CI] | p-value          |
|-----------------|---------------------------------|------------------|----------------------------------------------------------|------------------|---------------------------------------------------------|------------------|--------------------------------|------------------|
| 6 – 12 years    | 1.00<br>[0.68 – 1.39]           | 0.988            | 1.08<br>[1.02 – 1.14]                                    | <b>0.003</b>     | 1.12<br>[0.96 – 1.31]                                   | 0.124            | 1.04<br>[0.86 – 1.24]          | 0.665            |
| 13 – 17 years   | 0.99<br>[0.78 – 1.26]           | 0.955            | 1.01<br>[0.98 – 1.04]                                    | 0.274            | 1.15<br>[1.02 – 1.30]                                   | <b>0.016</b>     | 1.13<br>[0.99 – 1.31]          | 0.068            |
| 18 – 25 years   | 0.89<br>[0.83 – 0.96]           | <b>0.002</b>     | 1.04<br>[1.02 – 1.05]                                    | <b>&lt;0.001</b> | 1.12<br>[1.08 – 1.16]                                   | <b>&lt;0.001</b> | 1.07<br>[1.03 – 1.12]          | <b>&lt;0.001</b> |
| Antidepressants | 1.00<br>[0.95 – 1.06]           | 0.943            | 1.09<br>[1.08 – 1.10]                                    | <b>&lt;0.001</b> | 1.20<br>[1.17 – 1.23]                                   | <b>&lt;0.001</b> | 1.10<br>[1.07 – 1.13]          | <b>&lt;0.001</b> |
| Females         | 1.02<br>[0.95 – 1.09]           | 0.616            | 1.10<br>[1.08 – 1.11]                                    | <b>&lt;0.001</b> | 1.24<br>[1.21 – 1.28]                                   | <b>&lt;0.001</b> | 1.13<br>[1.09 – 1.16]          | <b>&lt;0.001</b> |
| Males           | 0.98<br>[0.94 – 1.02]           | 0.348            | 1.08<br>[1.06 – 1.09]                                    | <b>&lt;0.001</b> | 1.12<br>[1.10 – 1.14]                                   | <b>&lt;0.001</b> | 1.03<br>[1.01 – 1.06]          | <b>&lt;0.001</b> |
| 0 – 5 years     | 0.85<br>[0.81 – 0.90]           | <b>&lt;0.001</b> | 0.95<br>[0.93 – 0.96]                                    | <b>&lt;0.001</b> | 1.12<br>[1.09 – 1.15]                                   | <b>&lt;0.001</b> | 1.17<br>[1.14 – 1.21]          | <b>&lt;0.001</b> |
| 6 – 12 years    | 1.02<br>[0.92 – 1.13]           | 0.694            | 1.02<br>[1.01 – 1.04]                                    | <b>&lt;0.001</b> | 1.14<br>[1.10 – 1.19]                                   | <b>&lt;0.001</b> | 1.11<br>[1.07 – 1.15]          | <b>&lt;0.001</b> |
| 13 – 17 years   | 1.03<br>[0.91 – 1.16]           | 0.664            | 1.09<br>[1.08 – 1.10]                                    | <b>&lt;0.001</b> | 1.28<br>[1.21 – 1.35]                                   | <b>&lt;0.001</b> | 1.17<br>[1.10 – 1.24]          | <b>&lt;0.001</b> |
| 18 – 25 years   | 1.00<br>[0.95 – 1.04]           | 0.906            | 1.08<br>[1.06 – 1.10]                                    | <b>&lt;0.001</b> | 1.17<br>[1.15 – 1.19]                                   | <b>&lt;0.001</b> | 1.08<br>[1.05 – 1.10]          | <b>&lt;0.001</b> |
| Anxiolytics     | 1.02<br>[0.96 – 1.08]           | 0.562            | 1.02<br>[1.01 – 1.02]                                    | <b>&lt;0.001</b> | 1.05<br>[1.02 – 1.08]                                   | <b>&lt;0.001</b> | 1.03<br>[1.00 – 1.06]          | <b>0.033</b>     |
| Females         | 1.04<br>[0.96 – 1.12]           | 0.365            | 1.02<br>[1.01 – 1.03]                                    | <b>&lt;0.001</b> | 1.07<br>[1.04 – 1.11]                                   | <b>&lt;0.001</b> | 1.05<br>[1.01 – 1.09]          | <b>0.005</b>     |
| Males           | 0.99<br>[0.96 – 1.03]           | 0.755            | 1.01<br>[1.00 – 1.02]                                    | <b>&lt;0.001</b> | 1.01<br>[0.99 – 1.03]                                   | 0.055            | 1.00<br>[0.97 – 1.02]          | 0.903            |
| 0 – 5 years     | 0.83<br>[0.76 – 0.92]           | <b>&lt;0.001</b> | 0.93<br>[0.91 – 0.96]                                    | <b>&lt;0.001</b> | 1.09<br>[1.03 – 1.16]                                   | <b>0.003</b>     | 1.17<br>[1.08 – 1.25]          | <b>&lt;0.001</b> |
| 6 – 12 years    | 1.01<br>[0.96 – 1.07]           | 0.653            | 0.98<br>[0.97 – 0.99]                                    | <b>&lt;0.001</b> | 1.06<br>[1.03 – 1.09]                                   | <b>&lt;0.001</b> | 1.08<br>[1.04 – 1.11]          | <b>&lt;0.001</b> |
| 13 – 17 years   | 1.08<br>[0.95 – 1.24]           | 0.232            | 0.99<br>[0.98 – 1.00]                                    | 0.337            | 1.06<br>[0.99 – 1.12]                                   | 0.069            | 1.06<br>[0.99 – 1.14]          | 0.069            |
| 18 – 25 years   | 1.01<br>[0.96 – 1.06]           | 0.669            | 1.02<br>[1.01 – 1.04]                                    | <b>0.001</b>     | 1.04<br>[1.02 – 1.06]                                   | <b>&lt;0.001</b> | 1.01<br>[0.98 – 1.04]          | 0.438            |
| Hypnotics       | 1.03<br>[1.00 – 1.07]           | 0.066            | 0.96<br>[0.95 – 0.98]                                    | <b>&lt;0.001</b> | 1.04<br>[1.03 – 1.05]                                   | <b>&lt;0.001</b> | 1.07<br>[1.05 – 1.09]          | <b>&lt;0.001</b> |
| Females         | 1.06<br>[1.02 – 1.09]           | <b>0.001</b>     | 0.95<br>[0.94 – 0.97]                                    | <b>&lt;0.001</b> | 1.06<br>[1.05 – 1.07]                                   | <b>&lt;0.001</b> | 1.11<br>[1.09 – 1.13]          | <b>&lt;0.001</b> |

|                  | Immediate effect<br>RR [95% CI] | p-value          | Annual trends before<br>the pandemic,<br>RR [95% CI] (1) | p-value          | Annual trends after<br>the pandemic,<br>RR [95% CI] (2) | p-value          | RR diff (2) vs (1)<br>[95% CI] | p-value          |
|------------------|---------------------------------|------------------|----------------------------------------------------------|------------------|---------------------------------------------------------|------------------|--------------------------------|------------------|
| Males            | 1.00<br>[0.96 – 1.05]           | 0.821            | 0.98<br>[0.96 – 0.99]                                    | <b>0.029</b>     | 1.01<br>[0.99 – 1.02]                                   | 0.106            | 1.03<br>[1.00 – 1.05]          | <b>0.007</b>     |
| 0 – 5 years      | 0.77<br>[0.68 – 0.88]           | <b>&lt;0.001</b> | 1.10<br>[1.06 – 1.13]                                    | <b>&lt;0.001</b> | 1.17<br>[1.09 – 1.25]                                   | <b>&lt;0.001</b> | 1.06<br>[0.99 – 1.14]          | 0.072            |
| 6 – 12 years     | 0.94<br>[0.80 – 1.10]           | 0.420            | 1.09<br>[1.06 – 1.12]                                    | <b>&lt;0.001</b> | 1.04<br>[0.98 – 1.11]                                   | 0.139            | 0.96<br>[0.89 – 1.03]          | 0.267            |
| 13 – 17 years    | 1.06<br>[0.97 – 1.16]           | 0.222            | 0.95<br>[0.93 – 0.97]                                    | <b>&lt;0.001</b> | 1.04<br>[1.00 – 1.09]                                   | <b>0.036</b>     | 1.09<br>[1.04 – 1.15]          | <b>&lt;0.001</b> |
| 18 – 25 years    | 1.06<br>[1.03 – 1.10]           | <b>&lt;0.001</b> | 0.94<br>[0.92 – 0.96]                                    | <b>&lt;0.001</b> | 1.02<br>[1.01 – 1.03]                                   | <b>&lt;0.001</b> | 1.08<br>[1.06 – 1.10]          | <b>&lt;0.001</b> |
| Mood stabilizers | 0.98<br>[0.96 – 1.01]           | 0.184            | 1.00<br>[1.00 – 1.01]                                    | <b>0.002</b>     | 1.03<br>[1.03 – 1.04]                                   | <b>&lt;0.001</b> | 1.02<br>[1.02 – 1.03]          | <b>&lt;0.001</b> |
| Females          | 0.99<br>[0.96 – 1.02]           | 0.353            | 1.00<br>[1.00 – 1.01]                                    | <b>0.007</b>     | 1.06<br>[1.06 – 1.07]                                   | <b>&lt;0.001</b> | 1.05<br>[1.04 – 1.06]          | <b>&lt;0.001</b> |
| Males            | 0.98<br>[0.96 – 1.00]           | 0.100            | 1.00<br>[0.99 – 1.00]                                    | 0.052            | 1.01<br>[1.00 – 1.01]                                   | <b>0.002</b>     | 1.00<br>[0.99 – 1.01]          | 0.147            |
| 0 – 5 years      | 0.96<br>[0.92 – 1.00]           | 0.052            | 0.94<br>[0.93 – 0.95]                                    | <b>&lt;0.001</b> | 1.01<br>[0.99 – 1.03]                                   | 0.140            | 1.07<br>[1.04 – 1.10]          | <b>&lt;0.001</b> |
| 6 – 12 years     | 0.99<br>[0.96 – 1.02]           | 0.464            | 0.98<br>[0.97 – 0.98]                                    | <b>&lt;0.001</b> | 0.99<br>[0.98 – 1.00]                                   | 0.094            | 1.01<br>[1.00 – 1.02]          | <b>0.008</b>     |
| 13 – 17 years    | 0.99<br>[0.97 – 1.02]           | 0.497            | 0.98<br>[0.98 – 0.99]                                    | <b>&lt;0.001</b> | 1.01<br>[1.01 – 1.02]                                   | <b>&lt;0.001</b> | 1.03<br>[1.02 – 1.03]          | <b>&lt;0.001</b> |
| 18 – 25 years    | 0.98<br>[0.96 – 1.01]           | 0.190            | 1.03<br>[1.02 – 1.04]                                    | <b>&lt;0.001</b> | 1.05<br>[1.04 – 1.06]                                   | <b>&lt;0.001</b> | 1.01<br>[1.00 – 1.03]          | <b>0.009</b>     |
| Antipsychotics   | 0.98<br>[0.95 – 1.01]           | 0.148            | 1.06<br>[1.05 – 1.07]                                    | <b>&lt;0.001</b> | 1.10<br>[1.09 – 1.11]                                   | <b>&lt;0.001</b> | 1.03<br>[1.02 – 1.05]          | <b>&lt;0.001</b> |
| Females          | 1.00<br>[0.95 – 1.04]           | 0.872            | 1.09<br>[1.08 – 1.09]                                    | <b>&lt;0.001</b> | 1.19<br>[1.17 – 1.21]                                   | <b>&lt;0.001</b> | 1.09<br>[1.07 – 1.11]          | <b>&lt;0.001</b> |
| Males            | 0.98<br>[0.96 – 1.00]           | <b>0.046</b>     | 1.04<br>[1.04 – 1.05]                                    | <b>&lt;0.001</b> | 1.04<br>[1.03 – 1.05]                                   | <b>&lt;0.001</b> | 0.99<br>[0.98 – 1.00]          | 0.916            |
| 0 – 5 years      | 1.01<br>[0.93 – 1.10]           | 0.746            | 1.02<br>[1.00 – 1.03]                                    | <b>0.008</b>     | 1.10<br>[1.06 – 1.13]                                   | <b>&lt;0.001</b> | 1.07<br>[1.04 – 1.11]          | <b>&lt;0.001</b> |
| 6 – 12 years     | 0.97<br>[0.93 – 1.02]           | 0.279            | 1.05<br>[1.04 – 1.06]                                    | <b>&lt;0.001</b> | 1.10<br>[1.08 – 1.12]                                   | <b>&lt;0.001</b> | 1.04<br>[1.02 – 1.06]          | <b>&lt;0.001</b> |
| 13 – 17 years    | 0.99<br>[0.94 – 1.05]           | 0.839            | 1.04<br>[1.03 – 1.05]                                    | <b>&lt;0.001</b> | 1.12<br>[1.09 – 1.14]                                   | <b>&lt;0.001</b> | 1.07<br>[1.04 – 1.09]          | <b>&lt;0.001</b> |
| 18 – 25 years    | 0.97<br>[0.95 – 1.00]           | 0.050            | 1.06<br>[1.04 – 1.08]                                    | <b>&lt;0.001</b> | 1.08<br>[1.08 – 1.08]                                   | <b>&lt;0.001</b> | 1.02<br>[1.00 – 1.03]          | <b>0.031</b>     |



|                                  | Immediate effect<br>RR [95% CI] | p-value          | Annual trends before<br>the pandemic,<br>RR [95% CI] (1) | p-value          | Annual trends after<br>the pandemic,<br>RR [95% CI] (2) | p-value          | RR diff (2) vs (1)<br>[95% CI] | p-value          |
|----------------------------------|---------------------------------|------------------|----------------------------------------------------------|------------------|---------------------------------------------------------|------------------|--------------------------------|------------------|
| Methylphenidate                  | 0.89<br>[0.85 – 0.93]           | <b>&lt;0.001</b> | 1.08<br>[1.07 – 1.09]                                    | <b>&lt;0.001</b> | 1.19<br>[1.17 – 1.22]                                   | <b>&lt;0.001</b> | 1.10<br>[1.08 – 1.13]          | <b>&lt;0.001</b> |
| Females                          | 0.87<br>[0.83 – 0.90]           | <b>&lt;0.001</b> | 1.09<br>[1.08 – 1.10]                                    | <b>&lt;0.001</b> | 1.26<br>[1.24 – 1.29]                                   | <b>&lt;0.001</b> | 1.15<br>[1.13 – 1.18]          | <b>&lt;0.001</b> |
| Males                            | 0.89<br>[0.85 – 0.93]           | <b>&lt;0.001</b> | 1.07<br>[1.06 – 1.08]                                    | <b>&lt;0.001</b> | 1.17<br>[1.15 – 1.20]                                   | <b>&lt;0.001</b> | 1.09<br>[1.06 – 1.12]          | <b>&lt;0.001</b> |
| 0 – 5 years                      | 0.93<br>[0.84 – 1.02]           | 0.101            | 1.05<br>[1.03 – 1.07]                                    | <b>&lt;0.001</b> | 1.13<br>[1.08 – 1.17]                                   | <b>&lt;0.001</b> | 1.07<br>[1.02 – 1.12]          | <b>0.001</b>     |
| 6 – 12 years                     | 0.91<br>[0.87 – 0.95]           | <b>&lt;0.001</b> | 1.07<br>[1.06 – 1.08]                                    | <b>&lt;0.001</b> | 1.18<br>[1.15 – 1.20]                                   | <b>&lt;0.001</b> | 1.09<br>[1.07 – 1.12]          | <b>&lt;0.001</b> |
| 13 – 17 years                    | 0.86<br>[0.81 – 0.90]           | <b>&lt;0.001</b> | 1.08<br>[1.06 – 1.09]                                    | <b>&lt;0.001</b> | 1.18<br>[1.15 – 1.21]                                   | <b>&lt;0.001</b> | 1.09<br>[1.07 – 1.12]          | <b>&lt;0.001</b> |
| 18 – 25 years                    | 0.84<br>[0.80 – 0.88]           | <b>&lt;0.001</b> | 1.12<br>[1.10 – 1.13]                                    | <b>&lt;0.001</b> | 1.33<br>[1.31 – 1.36]                                   | <b>&lt;0.001</b> | 1.19<br>[1.16 – 1.22]          | <b>&lt;0.001</b> |
| Drugs used in alcohol dependence | 0.89<br>[0.84 – 0.95]           | <b>&lt;0.001</b> | 1.02<br>[1.00 – 1.05]                                    | <b>0.047</b>     | 1.13<br>[1.10 – 1.16]                                   | <b>&lt;0.001</b> | 1.10<br>[1.06 – 1.14]          | <b>&lt;0.001</b> |
| Females                          | 0.86<br>[0.80 – 0.93]           | <b>&lt;0.001</b> | 1.06<br>[1.03 – 1.09]                                    | <b>&lt;0.001</b> | 1.19<br>[1.17 – 1.21]                                   | <b>&lt;0.001</b> | 1.12<br>[1.08 – 1.16]          | <b>&lt;0.001</b> |
| Males                            | 0.91<br>[0.86 – 0.97]           | <b>0.004</b>     | 1.01<br>[0.98 – 1.04]                                    | 0.467            | 1.09<br>[1.06 – 1.13]                                   | <b>&lt;0.001</b> | 1.08<br>[1.04 – 1.13]          | <b>&lt;0.001</b> |
| 0 – 5 years                      | NA                              | NA               | NA                                                       | NA               | NA                                                      | NA               | NA                             | NA               |
| 6 – 12 years                     | NA                              | NA               | NA                                                       | NA               | NA                                                      | NA               | NA                             | NA               |
| 13 – 17 years                    | 0.72<br>[0.59 – 0.87]           | <b>&lt;0.001</b> | 1.05<br>[0.99 – 1.12]                                    | 0.099            | 1.08<br>[0.97 – 1.19]                                   | 0.133            | 1.02<br>[0.90 – 1.15]          | 0.686            |
| 18 – 25 years                    | 0.90<br>[0.84 – 0.96]           | <b>0.002</b>     | 1.01<br>[0.98 – 1.05]                                    | 0.238            | 1.12<br>[1.09 – 1.15]                                   | <b>&lt;0.001</b> | 1.10<br>[1.06 – 1.15]          | <b>&lt;0.001</b> |

In bold: statistical significance. NA: not applicable

**eTable 3.** Change in Prescription Rates Between 2016 and 2022 by Drug

|                                 | All        |            | Males      |            | Females    |            | 0-5 years |           | 6-12 years |           | 13-17 years |           | 18-25 years |           |
|---------------------------------|------------|------------|------------|------------|------------|------------|-----------|-----------|------------|-----------|-------------|-----------|-------------|-----------|
|                                 | 2016       | 2022       | 2016       | 2022       | 2016       | 2022       | 2016      | 2022      | 2016       | 2022      | 2016        | 2022      | 2016        | 2022      |
| Whole population                | 20,829,566 | 20,697,169 | 10,621,339 | 10,593,993 | 10,208,227 | 10,103,176 | 4,695,667 | 4,277,675 | 5,864,399  | 5,769,970 | 4,177,541   | 4,309,077 | 6,091,959   | 6,340,447 |
| <b>Mood stabilizers</b>         |            |            |            |            |            |            |           |           |            |           |             |           |             |           |
| N03AF01<br>(Carbamazepine), N   | 10,145     | 10,340     | 5,754      | 5,627      | 4,391      | 4,713      | 1,030     | 1,132     | 2,322      | 2,255     | 2,624       | 2,477     | 4,843       | 5,172     |
| Rates (/1000)                   | 0.49       | 0.50       | 0.54       | 0.53       | 0.43       | 0.47       | 0.22      | 0.26      | 0.40       | 0.39      | 0.63        | 0.57      | 0.79        | 0.82      |
| Change in rates                 | 3%         |            | -2%        |            | 8%         |            | 21%       |           | -1%        |           | -8%         |           | 3%          |           |
| N03AG01 (Valproic acid), N      | 43,714     | 36,132     | 27,680     | 25,549     | 16,037     | 10,583     | 8,625     | 5,642     | 12,153     | 9,380     | 9,582       | 7,830     | 16,566      | 15,908    |
| Rates (/1000)                   | 2.10       | 1.75       | 2.61       | 2.41       | 1.57       | 1.05       | 1.84      | 1.32      | 2.07       | 1.63      | 2.29        | 1.82      | 2.72        | 2.51      |
| Change in rates                 | -17%       |            | -7%        |            | -33%       |            | -28%      |           | -22%       |           | -21%        |           | -8%         |           |
| N03AX09<br>(Lamotrigine), N     | 26,631     | 39,198     | 10,143     | 13,097     | 16,488     | 26,101     | 1,344     | 1,218     | 4,832      | 5,041     | 7,052       | 8,745     | 15,222      | 26,499    |
| Rates (/1000)                   | 1.28       | 1.89       | 0.95       | 1.24       | 1.62       | 2.58       | 0.29      | 0.28      | 0.82       | 0.87      | 1.69        | 2.03      | 2.50        | 4.18      |
| Change in rates                 | 48%        |            | 29%        |            | 60%        |            | -1%       |           | 6%         |           | 20%         |           | 67%         |           |
| N05AN01 (Lithium), N            | 2,525      | 6,391      | 1,128      | 2,131      | 1,397      | 4,260      | 22        | 19        | 43         | 79        | 294         | 719       | 2,219       | 5,755     |
| Rates (/1000)                   | 0.12       | 0.31       | 0.11       | 0.20       | 0.14       | 0.42       | 0.00      | 0.00      | 0.01       | 0.01      | 0.07        | 0.17      | 0.36        | 0.91      |
| Change in rates                 | 155%       |            | 89%        |            | 208%       |            | -5%       |           | 87%        |           | 137%        |           | 149%        |           |
| <b>Antipsychotics</b>           |            |            |            |            |            |            |           |           |            |           |             |           |             |           |
| N05AA01<br>(Chlorpromazine), N  | 1,850      | 4,024      | 822        | 1,484      | 1,028      | 2,540      | 33        | 35        | 149        | 279       | 364         | 1,129     | 1,350       | 2,661     |
| Rates (/1000)                   | 0.09       | 0.19       | 0.08       | 0.14       | 0.10       | 0.25       | 0.01      | 0.01      | 0.03       | 0.05      | 0.09        | 0.26      | 0.22        | 0.42      |
| Change in rates                 | 119%       |            | 81%        |            | 150%       |            | 16%       |           | 90%        |           | 201%        |           | 89%         |           |
| N05AA02<br>(Levomepronazine), N | 2,951      | 4,466      | 1,937      | 2,412      | 1,014      | 2,054      | 58        | 32        | 433        | 593       | 825         | 1,576     | 1,750       | 2,451     |
| Rates (/1000)                   | 0.14       | 0.22       | 0.18       | 0.23       | 0.10       | 0.20       | 0.01      | 0.01      | 0.07       | 0.10      | 0.20        | 0.37      | 0.29        | 0.39      |
| Change in rates                 | 52%        |            | 25%        |            | 105%       |            | -39%      |           | 39%        |           | 85%         |           | 35%         |           |
| N05AA06<br>(Cyamemazine), N     | 37,779     | 66,331     | 23,852     | 31,191     | 13,928     | 35,140     | 615       | 742       | 6,223      | 8,899     | 13,941      | 26,170    | 18,546      | 33,131    |
| Rates (/1000)                   | 1.81       | 3.20       | 2.25       | 2.94       | 1.36       | 3.48       | 0.13      | 0.17      | 1.06       | 1.54      | 3.34        | 6.07      | 3.04        | 5.23      |
| Change in rates                 | 77%        |            | 31%        |            | 155%       |            | 32%       |           | 45%        |           | 82%         |           | 72%         |           |
| N05AC01 (Periciazine), N        | 1,891      | 1,512      | 1,376      | 1,072      | 515        | 440        | 142       | 82        | 649        | 555       | 553         | 455       | 655         | 521       |
| Rates (/1000)                   | 0.09       | 0.07       | 0.13       | 0.10       | 0.05       | 0.04       | 0.03      | 0.02      | 0.11       | 0.10      | 0.13        | 0.11      | 0.11        | 0.08      |
| Change in rates                 | -20%       |            | -22%       |            | -14%       |            | -37%      |           | -13%       |           | -20%        |           | -24%        |           |
| N05AD01<br>(Haloperidol), N     | 4,511      | 4,464      | 3,108      | 3,016      | 1,403      | 1,448      | 57        | 29        | 488        | 414       | 903         | 926       | 3,205       | 3,244     |
| Rates (/1000)                   | 0.22       | 0.22       | 0.29       | 0.28       | 0.14       | 0.14       | 0.01      | 0.01      | 0.08       | 0.07      | 0.22        | 0.21      | 0.53        | 0.51      |

|                               | All        |            | Males      |            | Females    |            | 0-5 years |           | 6-12 years |           | 13-17 years |           | 18-25 years |           |
|-------------------------------|------------|------------|------------|------------|------------|------------|-----------|-----------|------------|-----------|-------------|-----------|-------------|-----------|
|                               | 2016       | 2022       | 2016       | 2022       | 2016       | 2022       | 2016      | 2022      | 2016       | 2022      | 2016        | 2022      | 2016        | 2022      |
| Whole population              | 20,829,566 | 20,697,169 | 10,621,339 | 10,593,993 | 10,208,227 | 10,103,176 | 4,695,667 | 4,277,675 | 5,864,399  | 5,769,970 | 4,177,541   | 4,309,077 | 6,091,959   | 6,340,447 |
| Change in rates               | 0%         |            | -3%        |            | 4%         |            | -44%      |           | -14%       |           | -1%         |           | -3%         |           |
| N05AD05<br>(Pipamperone), N   | 1,823      | 1,234      | 1,287      | 867        | 536        | 367        | 53        | 36        | 412        | 255       | 554         | 304       | 892         | 702       |
| Rates (/1000)                 | 0.09       | 0.06       | 0.12       | 0.08       | 0.05       | 0.04       | 0.01      | 0.01      | 0.07       | 0.04      | 0.13        | 0.07      | 0.15        | 0.11      |
| Change in rates               | -32%       |            | -32%       |            | -31%       |            | -25%      |           | -37%       |           | -47%        |           | -24%        |           |
| N05AF05<br>(Zuclopendixol), N | 1,949      | 2,124      | 1,521      | 1,537      | 428        | 587        | 1         | 2         | 93         | 65        | 547         | 451       | 1,397       | 1,692     |
| Rates (/1000)                 | 0.09       | 0.10       | 0.14       | 0.15       | 0.04       | 0.06       | 0.00      | 0.00      | 0.02       | 0.01      | 0.13        | 0.10      | 0.23        | 0.27      |
| Change in rates               | 10%        |            | 1%         |            | 39%        |            | 120%      |           | -29%       |           | -20%        |           | 16%         |           |
| N05AH01 (Loxapine),<br>N      | 8,887      | 15,859     | 5,935      | 8,570      | 2,952      | 7,290      | 7         | 12        | 238        | 445       | 1,811       | 3,306     | 7,017       | 12,476    |
| Rates (/1000)                 | 0.43       | 0.77       | 0.56       | 0.81       | 0.29       | 0.72       | 0.00      | 0.00      | 0.04       | 0.08      | 0.43        | 0.77      | 1.15        | 1.97      |
| Change in rates               | 80%        |            | 45%        |            | 150%       |            | 88%       |           | 90%        |           | 77%         |           | 71%         |           |
| N05AH02 (Clozapine),<br>N     | 1,401      | 2,767      | 965        | 1,742      | 436        | 1,025      |           | 4         | 7          | 22        | 123         | 326       | 1,300       | 2,488     |
| Rates (/1000)                 | 0.07       | 0.13       | 0.09       | 0.16       | 0.04       | 0.10       |           | 0.00      | 0.00       | 0.00      | 0.03        | 0.08      | 0.21        | 0.39      |
| Change in rates               | 99%        |            | 81%        |            | 138%       |            | NA        |           | 219%       |           | 157%        |           | 84%         |           |
| N05AH03<br>(Olanzapine), N    | 8,908      | 13,010     | 5,611      | 6,669      | 3,297      | 6,341      | 43        | 32        | 134        | 181       | 1,347       | 2,236     | 7,577       | 10,871    |
| Rates (/1000)                 | 0.43       | 0.63       | 0.53       | 0.63       | 0.32       | 0.63       | 0.01      | 0.01      | 0.02       | 0.03      | 0.32        | 0.52      | 1.24        | 1.71      |
| Change in rates               | 47%        |            | 19%        |            | 94%        |            | -18%      |           | 37%        |           | 61%         |           | 38%         |           |
| N05AH04<br>(Quetiapine), N    | 8,499      | 20,412     | 4,132      | 6,703      | 4,368      | 13,711     | 31        | 48        | 72         | 140       | 959         | 3,294     | 7,602       | 17,438    |
| Rates (/1000)                 | 0.41       | 0.99       | 0.39       | 0.63       | 0.43       | 1.36       | 0.01      | 0.01      | 0.01       | 0.02      | 0.23        | 0.76      | 1.25        | 2.75      |
| Change in rates               | 142%       |            | 63%        |            | 217%       |            | 70%       |           | 98%        |           | 233%        |           | 120%        |           |
| N05AL01 (Sulpiride), N        | 2,565      | 1,608      | 1,054      | 617        | 1,511      | 991        | 56        | 27        | 241        | 103       | 535         | 288       | 1,754       | 1,203     |
| Rates (/1000)                 | 0.12       | 0.08       | 0.10       | 0.06       | 0.15       | 0.10       | 0.01      | 0.01      | 0.04       | 0.02      | 0.13        | 0.07      | 0.29        | 0.19      |
| Change in rates               | -37%       |            | -41%       |            | -34%       |            | -47%      |           | -57%       |           | -48%        |           | -34%        |           |
| N05AL03 (Tiapride), N         | 2,759      | 1,881      | 1,886      | 1,178      | 873        | 703        | 63        | 16        | 476        | 287       | 719         | 395       | 1,573       | 1,235     |
| Rates (/1000)                 | 0.13       | 0.09       | 0.18       | 0.11       | 0.09       | 0.07       | 0.01      | 0.00      | 0.08       | 0.05      | 0.17        | 0.09      | 0.26        | 0.19      |
| Change in rates               | -31%       |            | -37%       |            | -19%       |            | -72%      |           | -39%       |           | -47%        |           | -25%        |           |
| N05AL05<br>(Amisulpride), N   | 3,159      | 3,878      | 2,007      | 2,047      | 1,152      | 1,831      | 13        | 8         | 20         | 28        | 389         | 417       | 2,779       | 3,474     |
| Rates (/1000)                 | 0.15       | 0.19       | 0.19       | 0.19       | 0.11       | 0.18       | 0.00      | 0.00      | 0.00       | 0.00      | 0.09        | 0.10      | 0.46        | 0.55      |
| Change in rates               | 24%        |            | 2%         |            | 61%        |            | -32%      |           | 42%        |           | 4%          |           | 20%         |           |
| N05AX08<br>(Risperidone), N   | 52,014     | 66,171     | 38,976     | 46,359     | 13,041     | 19,813     | 1,445     | 1,927     | 15,618     | 21,242    | 18,561      | 22,288    | 19,766      | 24,899    |
| Rates (/1000)                 | 2.50       | 3.20       | 3.67       | 4.38       | 1.28       | 1.96       | 0.31      | 0.45      | 2.66       | 3.68      | 4.44        | 5.17      | 3.24        | 3.93      |

|                                       | All        |            | Males      |            | Females    |            | 0-5 years |           | 6-12 years |           | 13-17 years |           | 18-25 years |           |
|---------------------------------------|------------|------------|------------|------------|------------|------------|-----------|-----------|------------|-----------|-------------|-----------|-------------|-----------|
|                                       | 2016       | 2022       | 2016       | 2022       | 2016       | 2022       | 2016      | 2022      | 2016       | 2022      | 2016        | 2022      | 2016        | 2022      |
| Whole population                      | 20,829,566 | 20,697,169 | 10,621,339 | 10,593,993 | 10,208,227 | 10,103,176 | 4,695,667 | 4,277,675 | 5,864,399  | 5,769,970 | 4,177,541   | 4,309,077 | 6,091,959   | 6,340,447 |
| Change in rates                       | 28%        |            | 19%        |            | 54%        |            | 46%       |           | 38%        |           | 16%         |           | 21%         |           |
| N05AX12<br>(Aripiprazole), N          | 21,480     | 45,643     | 12,770     | 21,744     | 8,710      | 23,899     | 55        | 145       | 1,618      | 4,491     | 6,349       | 14,311    | 14,460      | 28,712    |
| Rates (/1000)                         | 1.03       | 2.21       | 1.20       | 2.05       | 0.85       | 2.37       | 0.01      | 0.03      | 0.28       | 0.78      | 1.52        | 3.32      | 2.37        | 4.53      |
| Change in rates                       | 114%       |            | 71%        |            | 177%       |            | 189%      |           | 182%       |           | 119%        |           | 91%         |           |
| N05AX13<br>(Paliperidone), N          | 3,861      | 5,103      | 3,188      | 4,249      | 673        | 854        | 4         | 4         | 4          | 7         | 341         | 352       | 3,600       | 4,833     |
| Rates (/1000)                         | 0.19       | 0.25       | 0.30       | 0.40       | 0.07       | 0.08       | 0.00      | 0.00      | 0.00       | 0.00      | 0.08        | 0.08      | 0.59        | 0.76      |
| Change in rates                       | 33%        |            | 34%        |            | 28%        |            | 10%       |           | 78%        |           | 0%          |           | 29%         |           |
| <b>Anxiolytics</b>                    |            |            |            |            |            |            |           |           |            |           |             |           |             |           |
| N05BA01 (Diazepam),<br>N              | 57,632     | 74,825     | 28,168     | 34,747     | 29,465     | 40,078     | 13,983    | 8,015     | 5,127      | 3,764     | 6,816       | 8,827     | 32,023      | 54,732    |
| Rates (/1000)                         | 2.77       | 3.62       | 2.65       | 3.28       | 2.89       | 3.97       | 2.98      | 1.87      | 0.87       | 0.65      | 1.63        | 2.05      | 5.26        | 8.63      |
| Change in rates                       | 31%        |            | 24%        |            | 37%        |            | -37%      |           | -25%       |           | 26%         |           | 64%         |           |
| N05BA04 (Oxazepam),<br>N              | 32,159     | 74,937     | 13,037     | 24,882     | 19,122     | 50,055     | 182       | 254       | 274        | 439       | 3,748       | 8,505     | 28,134      | 66,213    |
| Rates (/1000)                         | 1.54       | 3.62       | 1.23       | 2.35       | 1.87       | 4.95       | 0.04      | 0.06      | 0.05       | 0.08      | 0.90        | 1.97      | 4.62        | 10.44     |
| Change in rates                       | 135%       |            | 91%        |            | 164%       |            | 53%       |           | 63%        |           | 120%        |           | 126%        |           |
| N05BA05 (Potassium<br>clorazepate), N | 4,633      | 4,347      | 2,184      | 1,769      | 2,449      | 2,578      | 25        | 14        | 170        | 109       | 757         | 615       | 3,727       | 3,653     |
| Rates (/1000)                         | 0.22       | 0.21       | 0.21       | 0.17       | 0.24       | 0.26       | 0.01      | 0.00      | 0.03       | 0.02      | 0.18        | 0.14      | 0.61        | 0.58      |
| Change in rates                       | -6%        |            | -19%       |            | 6%         |            | -39%      |           | -35%       |           | -21%        |           | -6%         |           |
| N05BA06 (Lorazepam),<br>N             | 10,277     | 18,860     | 4,259      | 6,691      | 6,018      | 12,169     | 58        | 50        | 124        | 173       | 1,406       | 2,704     | 8,774       | 16,152    |
| Rates (/1000)                         | 0.49       | 0.91       | 0.40       | 0.63       | 0.59       | 1.20       | 0.01      | 0.01      | 0.02       | 0.03      | 0.34        | 0.63      | 1.44        | 2.55      |
| Change in rates                       | 85%        |            | 58%        |            | 104%       |            | -5%       |           | 42%        |           | 86%         |           | 77%         |           |
| N05BA08<br>(Bromazepam), N            | 46,872     | 42,435     | 15,625     | 13,371     | 31,248     | 29,064     | 255       | 150       | 704        | 510       | 6,661       | 5,382     | 39,409      | 36,591    |
| Rates (/1000)                         | 2.25       | 2.05       | 1.47       | 1.26       | 3.06       | 2.88       | 0.05      | 0.04      | 0.12       | 0.09      | 1.59        | 1.25      | 6.47        | 5.77      |
| Change in rates                       | -9%        |            | -14%       |            | -6%        |            | -35%      |           | -26%       |           | -22%        |           | -11%        |           |
| N05BA09 (Clobazam),<br>N              | 18,055     | 17,506     | 8,846      | 8,629      | 9,209      | 8,877      | 1,085     | 788       | 3,189      | 2,811     | 4,158       | 3,958     | 10,334      | 10,603    |
| Rates (/1000)                         | 0.87       | 0.85       | 0.83       | 0.81       | 0.90       | 0.88       | 0.23      | 0.18      | 0.54       | 0.49      | 1.00        | 0.92      | 1.70        | 1.67      |
| Change in rates                       | -2%        |            | -2%        |            | -3%        |            | -20%      |           | -10%       |           | -8%         |           | -1%         |           |
| N05BA11 (Prazepam),<br>N              | 36,491     | 41,216     | 12,076     | 12,094     | 24,415     | 29,123     | 194       | 130       | 1,051      | 729       | 6,822       | 7,408     | 28,692      | 33,331    |
| Rates (/1000)                         | 1.75       | 1.99       | 1.14       | 1.14       | 2.39       | 2.88       | 0.04      | 0.03      | 0.18       | 0.13      | 1.63        | 1.72      | 4.71        | 5.26      |
| Change in rates                       | 14%        |            | 0%         |            | 21%        |            | -26%      |           | -30%       |           | 5%          |           | 12%         |           |

|                                      | All        |            | Males      |            | Females    |            | 0-5 years |           | 6-12 years |           | 13-17 years |           | 18-25 years |           |
|--------------------------------------|------------|------------|------------|------------|------------|------------|-----------|-----------|------------|-----------|-------------|-----------|-------------|-----------|
|                                      | 2016       | 2022       | 2016       | 2022       | 2016       | 2022       | 2016      | 2022      | 2016       | 2022      | 2016        | 2022      | 2016        | 2022      |
| Whole population                     | 20,829,566 | 20,697,169 | 10,621,339 | 10,593,993 | 10,208,227 | 10,103,176 | 4,695,667 | 4,277,675 | 5,864,399  | 5,769,970 | 4,177,541   | 4,309,077 | 6,091,959   | 6,340,447 |
| N05BA12<br>(Alprazolam), N           | 153,582    | 221,022    | 51,440     | 66,199     | 102,142    | 154,824    | 632       | 556       | 1,517      | 1,600     | 22,722      | 31,173    | 129,599     | 189,468   |
| Rates (/1000)                        | 7.37       | 10.68      | 4.84       | 6.25       | 10.01      | 15.32      | 0.13      | 0.13      | 0.26       | 0.28      | 5.44        | 7.23      | 21.27       | 29.88     |
| Change in rates                      | 45%        |            | 29%        |            | 53%        |            | -3%       |           | 7%         |           | 33%         |           | 40%         |           |
| N05BA21<br>(Clotiazepam), N          | 11,918     | 13,512     | 3,841      | 3,914      | 8,077      | 9,598      | 40        | 37        | 100        | 85        | 1,767       | 1,960     | 10,061      | 11,496    |
| Rates (/1000)                        | 0.57       | 0.65       | 0.36       | 0.37       | 0.79       | 0.95       | 0.01      | 0.01      | 0.02       | 0.01      | 0.42        | 0.45      | 1.65        | 1.81      |
| Change in rates                      | 14%        |            | 2%         |            | 20%        |            | 2%        |           | -14%       |           | 8%          |           | 10%         |           |
| N05BB01<br>(Hydroxyzine), N          | 256,684    | 293,117    | 109,819    | 112,298    | 146,865    | 180,819    | 40,848    | 33,690    | 50,868     | 56,689    | 62,719      | 80,199    | 104,116     | 125,343   |
| Rates (/1000)                        | 12.32      | 14.16      | 10.34      | 10.60      | 14.39      | 17.90      | 8.70      | 7.88      | 8.67       | 9.82      | 15.01       | 18.61     | 17.09       | 19.77     |
| Change in rates                      | 15%        |            | 3%         |            | 24%        |            | -9%       |           | 13%        |           | 24%         |           | 16%         |           |
| N05BE01 (Buspirone),<br>N            | 4,017      | 5,454      | 1,393      | 1,672      | 2,624      | 3,782      | 10        | 10        | 40         | 66        | 724         | 1,075     | 3,272       | 4,359     |
| Rates (/1000)                        | 0.19       | 0.26       | 0.13       | 0.16       | 0.26       | 0.37       | 0.00      | 0.00      | 0.01       | 0.01      | 0.17        | 0.25      | 0.54        | 0.69      |
| Change in rates                      | 37%        |            | 20%        |            | 46%        |            | 10%       |           | 68%        |           | 44%         |           | 28%         |           |
| <b>Hypnotics excluding melatonin</b> |            |            |            |            |            |            |           |           |            |           |             |           |             |           |
| N05CD06<br>(Lormetazepam), N         | 10,311     | 15,919     | 4,332      | 5,781      | 5,979      | 10,138     | 52        | 49        | 91         | 128       | 909         | 1,165     | 9,321       | 14,673    |
| Rates (/1000)                        | 0.50       | 0.77       | 0.41       | 0.55       | 0.59       | 1.00       | 0.01      | 0.01      | 0.02       | 0.02      | 0.22        | 0.27      | 1.53        | 2.31      |
| Change in rates                      | 55%        |            | 34%        |            | 71%        |            | 3%        |           | 43%        |           | 24%         |           | 51%         |           |
| N05CD08<br>(Midazolam), N            | 19,658     | 35,073     | 10,751     | 19,497     | 8,907      | 15,576     | 7,362     | 12,698    | 7,773      | 13,079    | 4,099       | 7,555     | 792         | 2,277     |
| Rates (/1000)                        | 0.94       | 1.69       | 1.01       | 1.84       | 0.87       | 1.54       | 1.57      | 2.97      | 1.33       | 2.27      | 0.98        | 1.75      | 0.13        | 0.36      |
| Change in rates                      | 80%        |            | 82%        |            | 77%        |            | 89%       |           | 71%        |           | 79%         |           | 176%        |           |
| N05CD11<br>(Loprazolam), N           | 3,369      | 3,262      | 1,313      | 1,176      | 2,056      | 2,086      | 13        | 15        | 44         | 25        | 340         | 230       | 2,988       | 2,999     |
| Rates (/1000)                        | 0.16       | 0.16       | 0.12       | 0.11       | 0.20       | 0.21       | 0.00      | 0.00      | 0.01       | 0.00      | 0.08        | 0.05      | 0.49        | 0.47      |
| Change in rates                      | -3%        |            | -10%       |            | 3%         |            | 27%       |           | -42%       |           | -34%        |           | -4%         |           |
| N05CF01 (Zopiclone),<br>N            | 35,889     | 57,031     | 14,791     | 21,471     | 21,098     | 35,560     | 158       | 199       | 232        | 293       | 3,848       | 4,653     | 31,824      | 52,167    |
| Rates (/1000)                        | 1.72       | 2.76       | 1.39       | 2.03       | 2.07       | 3.52       | 0.03      | 0.05      | 0.04       | 0.05      | 0.92        | 1.08      | 5.22        | 8.23      |
| Change in rates                      | 60%        |            | 46%        |            | 70%        |            | 38%       |           | 28%        |           | 17%         |           | 57%         |           |
| N05CF02 (Zolpidem),<br>N             | 56,484     | 9,465      | 21,348     | 3,616      | 35,136     | 5,849      | 291       | 59        | 421        | 102       | 5,160       | 784       | 50,846      | 8,562     |
| Rates (/1000)                        | 2.71       | 0.46       | 2.01       | 0.34       | 3.44       | 0.58       | 0.06      | 0.01      | 0.07       | 0.02      | 1.24        | 0.18      | 8.35        | 1.35      |
| Change in rates                      | -83%       |            | -83%       |            | -83%       |            | -78%      |           | -75%       |           | -85%        |           | -84%        |           |

|                               | All        |            | Males      |            | Females    |            | 0-5 years |           | 6-12 years |           | 13-17 years |           | 18-25 years |           |
|-------------------------------|------------|------------|------------|------------|------------|------------|-----------|-----------|------------|-----------|-------------|-----------|-------------|-----------|
|                               | 2016       | 2022       | 2016       | 2022       | 2016       | 2022       | 2016      | 2022      | 2016       | 2022      | 2016        | 2022      | 2016        | 2022      |
| Whole population              | 20,829,566 | 20,697,169 | 10,621,339 | 10,593,993 | 10,208,227 | 10,103,176 | 4,695,667 | 4,277,675 | 5,864,399  | 5,769,970 | 4,177,541   | 4,309,077 | 6,091,959   | 6,340,447 |
| <b>Antidepressants</b>        |            |            |            |            |            |            |           |           |            |           |             |           |             |           |
| N06AA04<br>(Clomipramine), N  | 5,269      | 4,937      | 2,804      | 2,046      | 2,465      | 2,891      | 99        | 36        | 1,412      | 617       | 1,144       | 965       | 2,727       | 3,425     |
| Rates (/1000)                 | 0.25       | 0.24       | 0.26       | 0.19       | 0.24       | 0.29       | 0.02      | 0.01      | 0.24       | 0.11      | 0.27        | 0.22      | 0.45        | 0.54      |
| Change in rates               | -6%        |            | -27%       |            | 19%        |            | -60%      |           | -56%       |           | -18%        |           | 21%         |           |
| N06AA09<br>(Amitriptyline), N | 28,767     | 35,760     | 9,836      | 10,581     | 18,931     | 25,180     | 777       | 512       | 3,895      | 3,373     | 7,463       | 8,068     | 17,115      | 24,393    |
| Rates (/1000)                 | 1.38       | 1.73       | 0.93       | 1.00       | 1.85       | 2.49       | 0.17      | 0.12      | 0.66       | 0.58      | 1.79        | 1.87      | 2.81        | 3.85      |
| Change in rates               | 25%        |            | 8%         |            | 34%        |            | -28%      |           | -12%       |           | 5%          |           | 37%         |           |
| N06AB03 (Fluoxetine),<br>N    | 23,585     | 61,383     | 7,609      | 16,015     | 15,976     | 45,368     | 123       | 167       | 945        | 2,264     | 6,348       | 21,589    | 16,813      | 39,567    |
| Rates (/1000)                 | 1.13       | 2.97       | 0.72       | 1.51       | 1.57       | 4.49       | 0.03      | 0.04      | 0.16       | 0.39      | 1.52        | 5.01      | 2.76        | 6.24      |
| Change in rates               | 162%       |            | 111%       |            | 187%       |            | 49%       |           | 143%       |           | 230%        |           | 126%        |           |
| N06AB04 (Citalopram),<br>N    | 6,481      | 4,123      | 2,245      | 1,213      | 4,236      | 2,910      | 81        | 24        | 96         | 52        | 783         | 508       | 5,612       | 3,587     |
| Rates (/1000)                 | 0.31       | 0.20       | 0.21       | 0.11       | 0.41       | 0.29       | 0.02      | 0.01      | 0.02       | 0.01      | 0.19        | 0.12      | 0.92        | 0.57      |
| Change in rates               | -36%       |            | -46%       |            | -31%       |            | -67%      |           | -45%       |           | -37%        |           | -39%        |           |
| N06AB05 (Paroxetine),<br>N    | 37,749     | 72,791     | 14,398     | 22,970     | 23,351     | 49,822     | 298       | 419       | 420        | 576       | 4,553       | 8,612     | 33,021      | 64,370    |
| Rates (/1000)                 | 1.81       | 3.52       | 1.36       | 2.17       | 2.29       | 4.93       | 0.06      | 0.10      | 0.07       | 0.10      | 1.09        | 2.00      | 5.42        | 10.15     |
| Change in rates               | 94%        |            | 60%        |            | 116%       |            | 54%       |           | 39%        |           | 83%         |           | 87%         |           |
| N06AB06 (Sertraline),<br>N    | 32,075     | 100,131    | 12,767     | 29,623     | 19,308     | 70,510     | 156       | 285       | 1,947      | 4,229     | 12,098      | 36,524    | 19,301      | 63,514    |
| Rates (/1000)                 | 1.54       | 4.84       | 1.20       | 2.80       | 1.89       | 6.98       | 0.03      | 0.07      | 0.33       | 0.73      | 2.90        | 8.48      | 3.17        | 10.02     |
| Change in rates               | 214%       |            | 133%       |            | 269%       |            | 101%      |           | 121%       |           | 193%        |           | 216%        |           |
| N06AB10<br>(Escitalopram), N  | 55,902     | 65,604     | 18,516     | 18,707     | 37,387     | 46,897     | 522       | 371       | 718        | 638       | 6,515       | 7,536     | 48,908      | 57,997    |
| Rates (/1000)                 | 2.68       | 3.17       | 1.74       | 1.77       | 3.66       | 4.64       | 0.11      | 0.09      | 0.12       | 0.11      | 1.56        | 1.75      | 8.03        | 9.15      |
| Change in rates               | 18%        |            | 1%         |            | 27%        |            | -22%      |           | -10%       |           | 12%         |           | 14%         |           |
| N06AX03 (Mianserine),<br>N    | 8,157      | 12,724     | 3,169      | 4,220      | 4,988      | 8,504      | 44        | 45        | 120        | 116       | 1,223       | 1,734     | 6,861       | 10,997    |
| Rates (/1000)                 | 0.39       | 0.61       | 0.30       | 0.40       | 0.49       | 0.84       | 0.01      | 0.01      | 0.02       | 0.02      | 0.29        | 0.40      | 1.13        | 1.73      |
| Change in rates               | 57%        |            | 34%        |            | 72%        |            | 12%       |           | -2%        |           | 37%         |           | 54%         |           |
| N06AX11<br>(Mirtazapine), N   | 7,168      | 15,872     | 3,165      | 5,891      | 4,003      | 9,981      | 37        | 45        | 61         | 91        | 824         | 1,817     | 6,345       | 14,140    |
| Rates (/1000)                 | 0.34       | 0.77       | 0.30       | 0.56       | 0.39       | 0.99       | 0.01      | 0.01      | 0.01       | 0.02      | 0.20        | 0.42      | 1.04        | 2.23      |
| Change in rates               | 123%       |            | 87%        |            | 152%       |            | 34%       |           | 52%        |           | 114%        |           | 114%        |           |

|                                     | All        |            | Males      |            | Females    |            | 0-5 years |           | 6-12 years |           | 13-17 years |           | 18-25 years |           |
|-------------------------------------|------------|------------|------------|------------|------------|------------|-----------|-----------|------------|-----------|-------------|-----------|-------------|-----------|
|                                     | 2016       | 2022       | 2016       | 2022       | 2016       | 2022       | 2016      | 2022      | 2016       | 2022      | 2016        | 2022      | 2016        | 2022      |
| Whole population                    | 20,829,566 | 20,697,169 | 10,621,339 | 10,593,993 | 10,208,227 | 10,103,176 | 4,695,667 | 4,277,675 | 5,864,399  | 5,769,970 | 4,177,541   | 4,309,077 | 6,091,959   | 6,340,447 |
| N06AX16<br>(Venlafaxine), N         | 20,939     | 42,060     | 7,606      | 12,918     | 13,333     | 29,142     | 231       | 215       | 299        | 347       | 2,031       | 4,261     | 18,648      | 37,952    |
| Rates (/1000)                       | 1.01       | 2.03       | 0.72       | 1.22       | 1.31       | 2.88       | 0.05      | 0.05      | 0.05       | 0.06      | 0.49        | 0.99      | 3.06        | 5.99      |
| Change in rates                     | 102%       |            | 70%        |            | 121%       |            | 2%        |           | 18%        |           | 103%        |           | 96%         |           |
| N06AX21 (Duloxetine),<br>N          | 5,898      | 8,186      | 2,088      | 2,361      | 3,810      | 5,825      | 61        | 61        | 110        | 103       | 534         | 692       | 5,249       | 7,408     |
| Rates (/1000)                       | 0.28       | 0.40       | 0.20       | 0.22       | 0.37       | 0.58       | 0.01      | 0.01      | 0.02       | 0.02      | 0.13        | 0.16      | 0.86        | 1.17      |
| Change in rates                     | 40%        |            | 13%        |            | 54%        |            | 10%       |           | -5%        |           | 26%         |           | 36%         |           |
| N06AX22<br>(Agomelatine), N         | 1,996      | 362        | 738        | 138        | 1,258      | 224        | 12        |           | 31         | 3         | 157         | 54        | 1,814       | 310       |
| Rates (/1000)                       | 0.10       | 0.02       | 0.07       | 0.01       | 0.12       | 0.02       | 0.00      |           | 0.01       | 0.00      | 0.04        | 0.01      | 0.30        | 0.05      |
| Change in rates                     | -82%       |            | -81%       |            | -82%       |            | -100%     |           | -90%       |           | -67%        |           | -84%        |           |
| <b>Alcohol dependence<br/>drugs</b> |            |            |            |            |            |            |           |           |            |           |             |           |             |           |
| N07BB03<br>(Acamprosate), N         | 909        | 1,281      | 692        | 919        | 217        | 362        | 9         | 2         | 6          | 10        | 31          | 27        | 863         | 1,242     |
| Rates (/1000)                       | 0.04       | 0.06       | 0.07       | 0.09       | 0.02       | 0.04       | 0.00      | 0.00      | 0.00       | 0.00      | 0.01        | 0.01      | 0.14        | 0.20      |
| Change in rates                     | 42%        |            | 33%        |            | 69%        |            | -76%      |           | 69%        |           | -16%        |           | 38%         |           |
| N07BB04 (Naltrexone),<br>N          | 691        | 983        | 445        | 530        | 246        | 453        | 4         | 3         | 11         | 9         | 55          | 43        | 629         | 935       |
| Rates (/1000)                       | 0.03       | 0.05       | 0.04       | 0.05       | 0.02       | 0.04       | 0.00      | 0.00      | 0.00       | 0.00      | 0.01        | 0.01      | 0.10        | 0.15      |
| Change in rates                     | 43%        |            | 19%        |            | 86%        |            | -18%      |           | -17%       |           | -24%        |           | 43%         |           |
| N07BB05 (Nalmefene),<br>N           | 1,289      | 1,002      | 951        | 640        | 338        | 362        | 7         | 3         | 14         | 6         | 36          | 21        | 1,233       | 973       |
| Rates (/1000)                       | 0.06       | 0.05       | 0.09       | 0.06       | 0.03       | 0.04       | 0.00      | 0.00      | 0.00       | 0.00      | 0.01        | 0.00      | 0.20        | 0.15      |
| Change in rates                     | -22%       |            | -33%       |            | 8%         |            | -53%      |           | -56%       |           | -43%        |           | -24%        |           |

NA: not applicable (division by zero).

**eFigure 1.** Sex-Specific Trends in Mental Health Care and Prescriptions Before and After the Beginning of the COVID-19 Pandemic With Annual Relative Risk

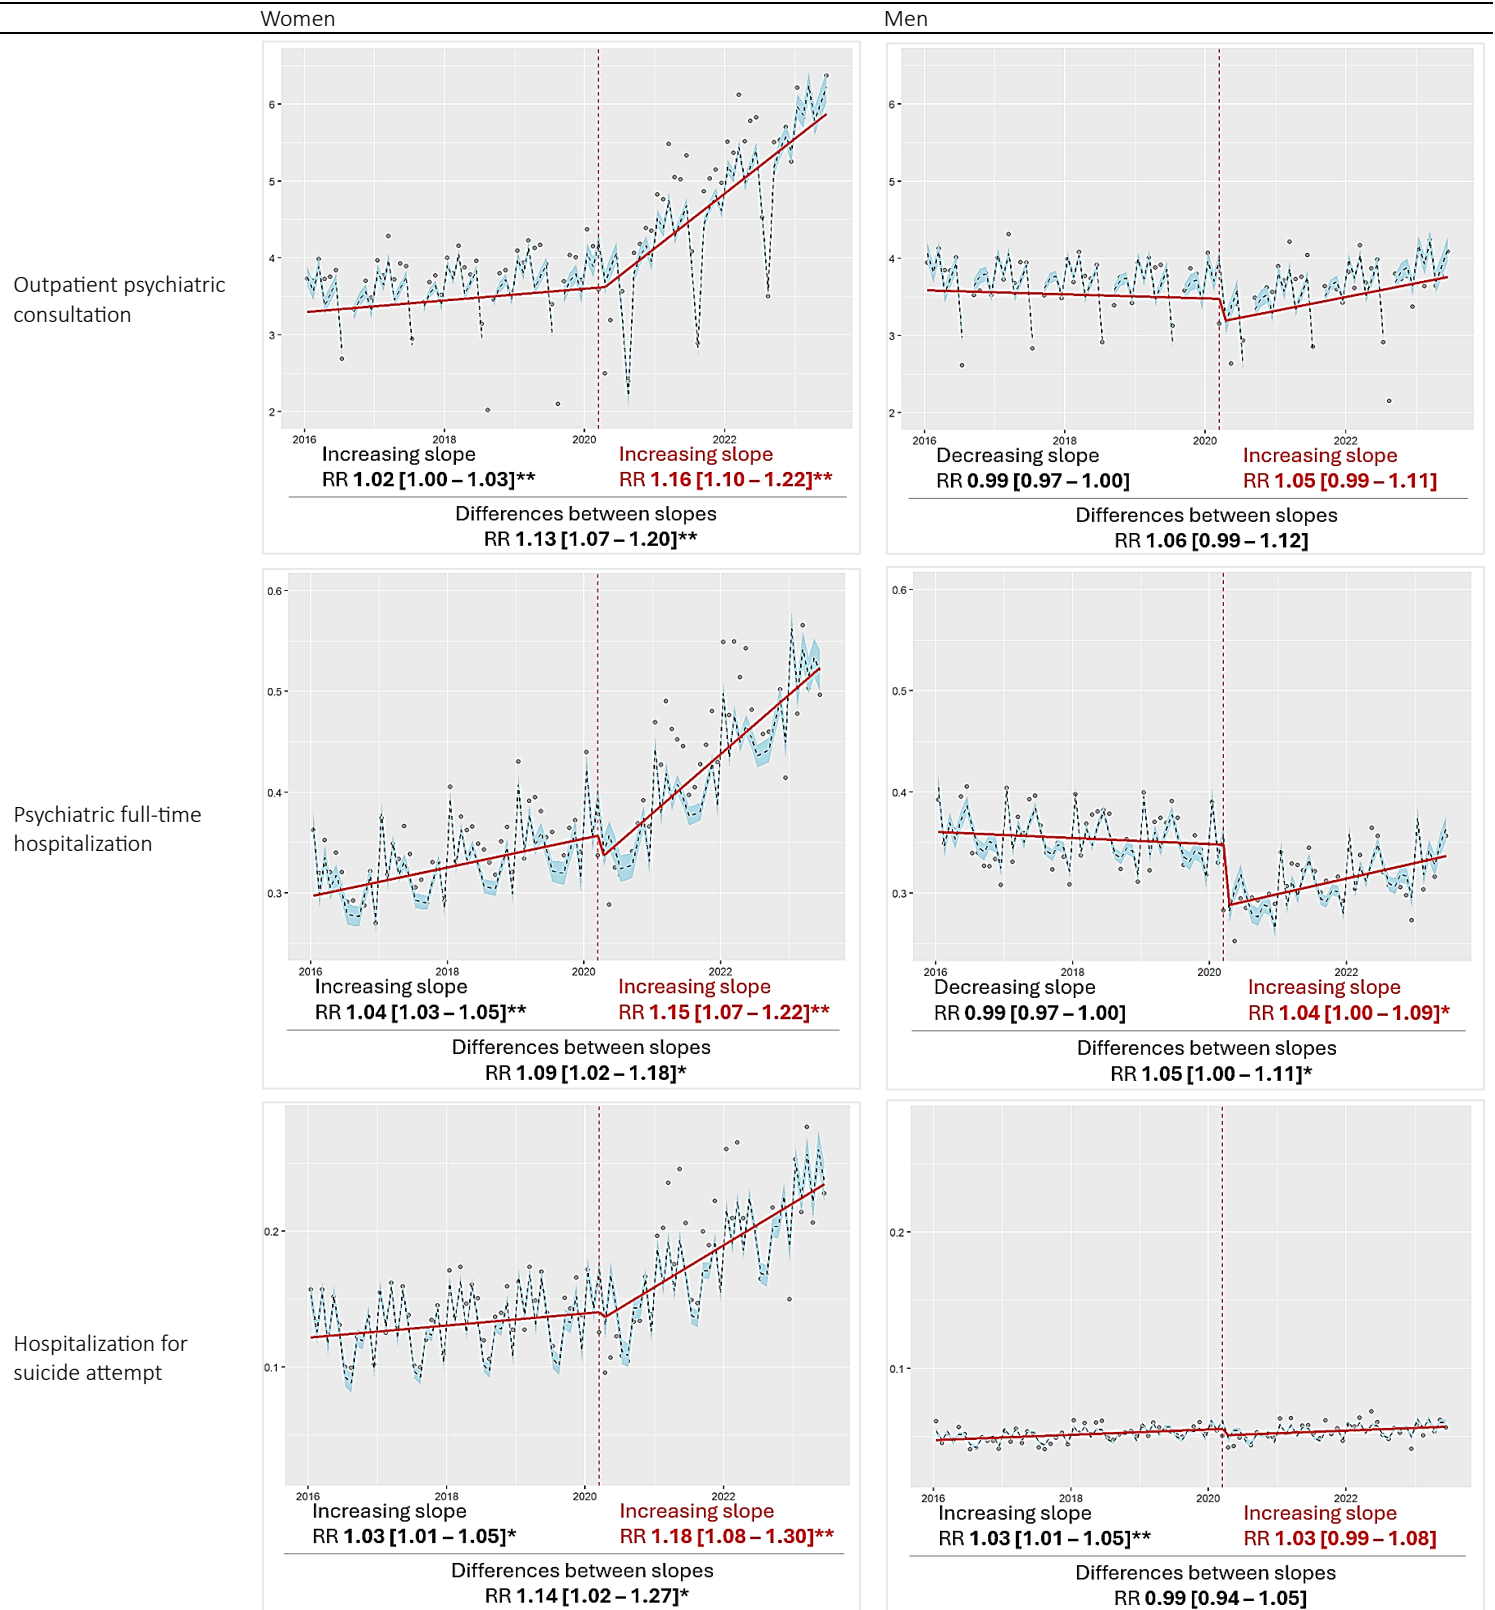



Women

Men

Antidepressants

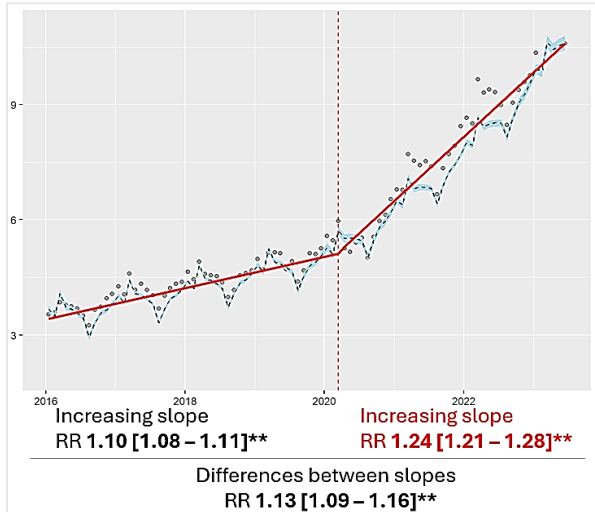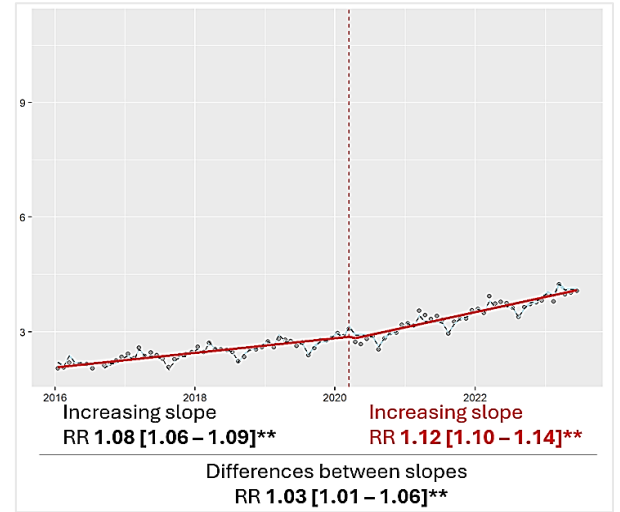

Anxiolytics

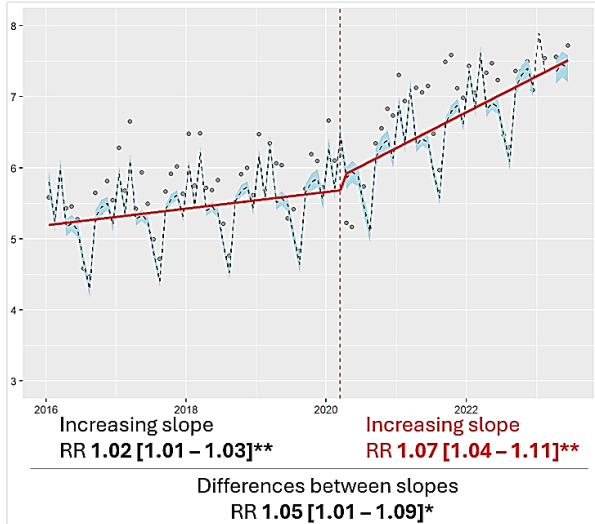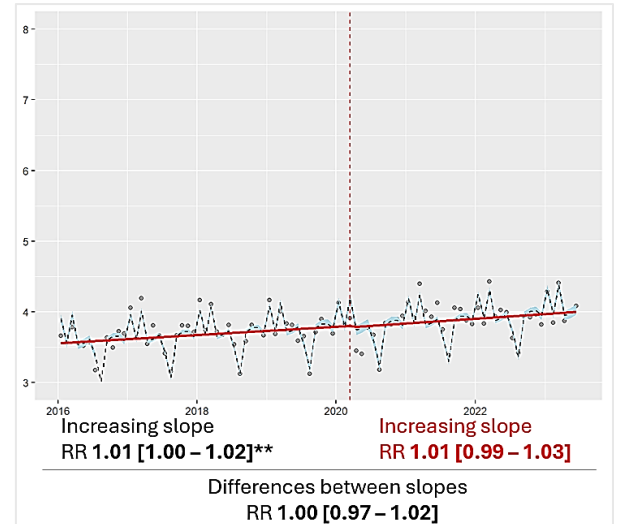

Hypnotics

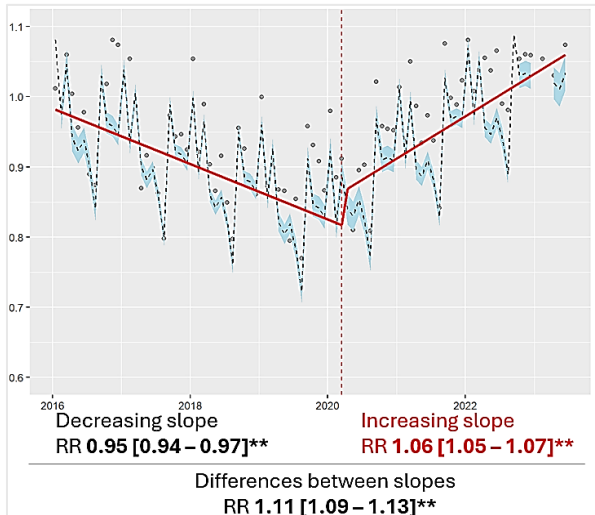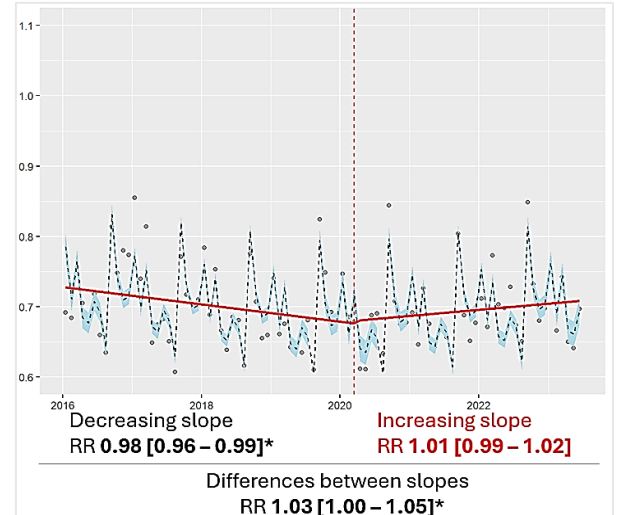

Women

Men

Mood stabilizers

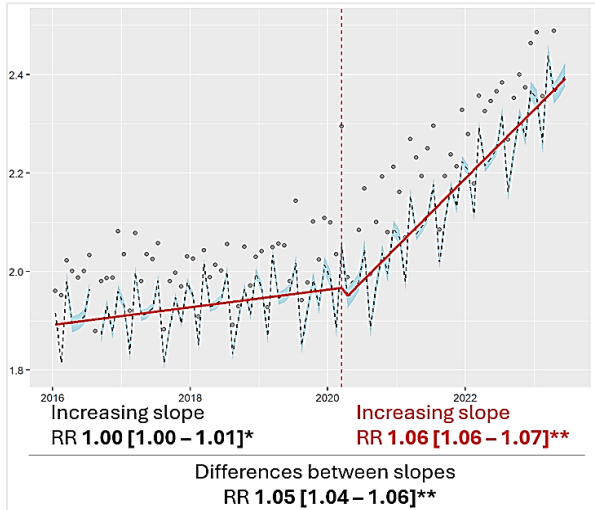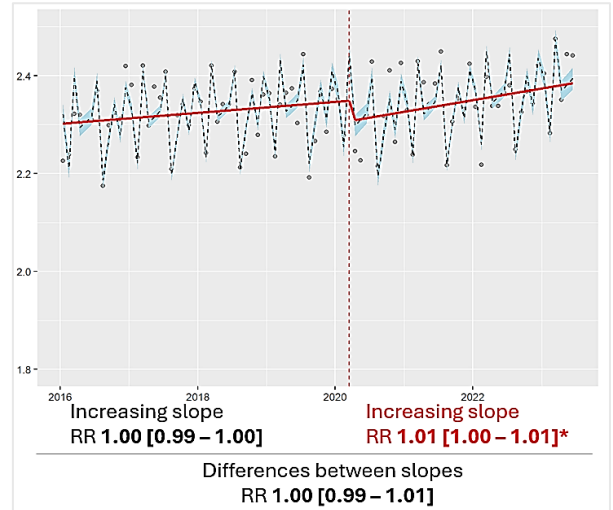

Antipsychotics

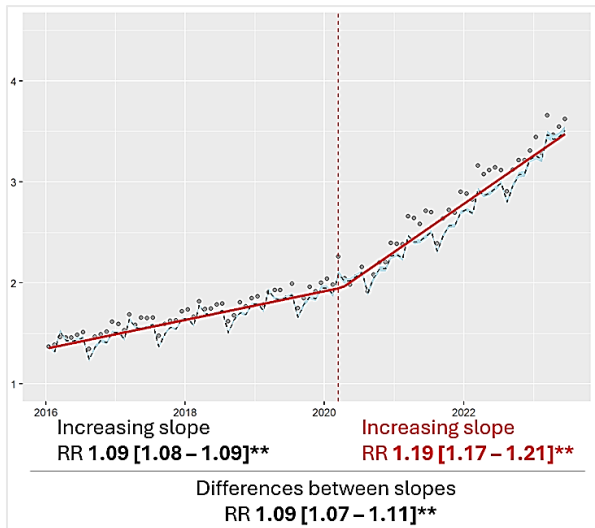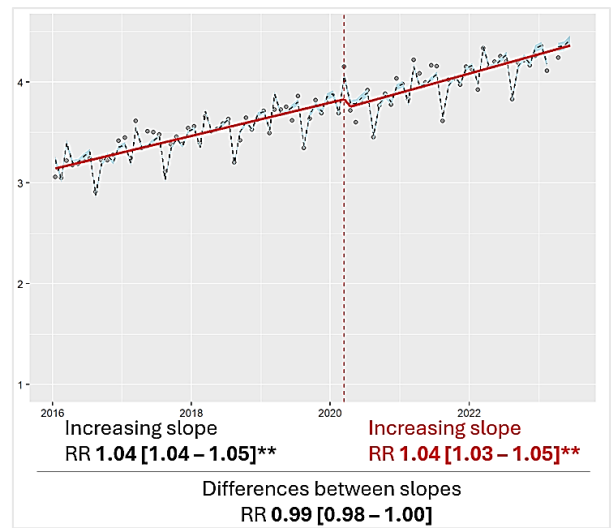

Methylphenidate

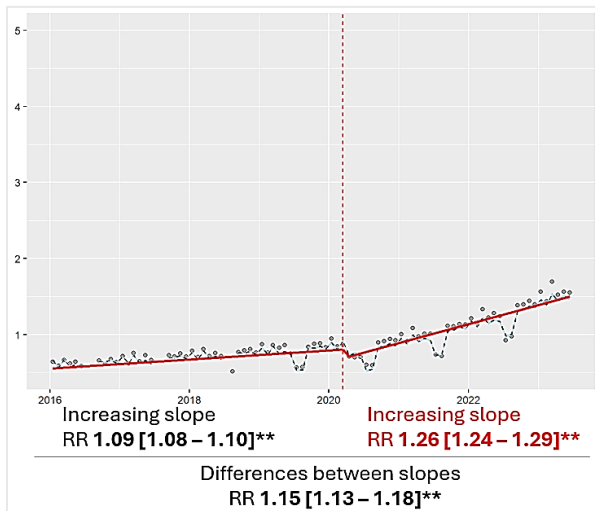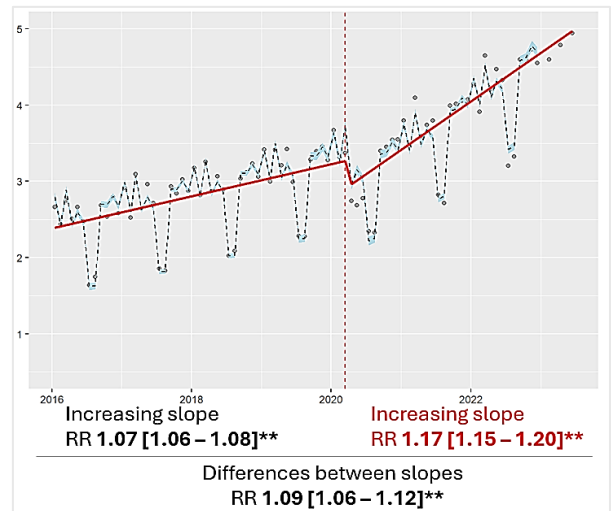

Medications used in alcohol dependence

Women

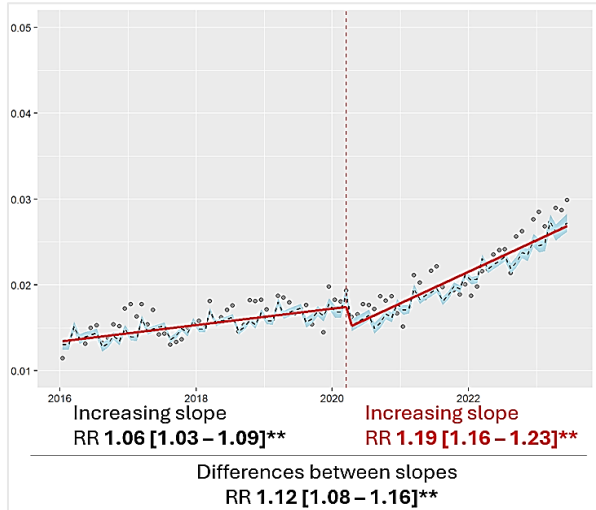

Men

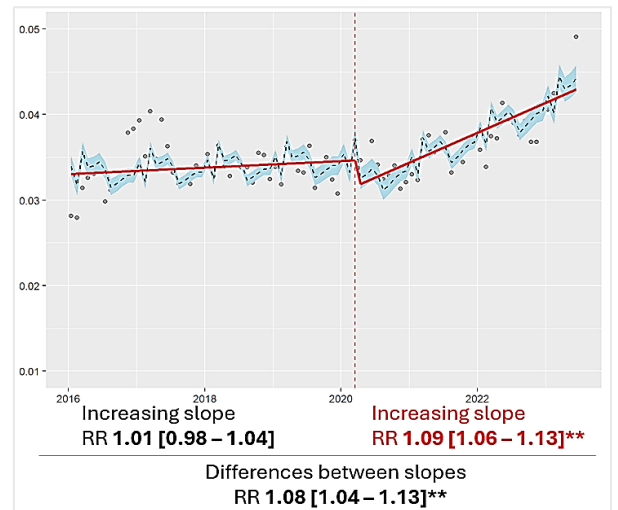

a:  $p < 0.05$

b:  $p < 0.001$

RR: relative risk.

Dotted lines are Quasi-Poisson estimates with confidence intervals. Dots are actual observations. The rates are expressed per 1,000 inhabitants.

**eFigure 2.** Age-Specific Trends in Mental Health Care and Prescriptions Before and After the Beginning of the COVID-19 Pandemic With Annual Relative Risk

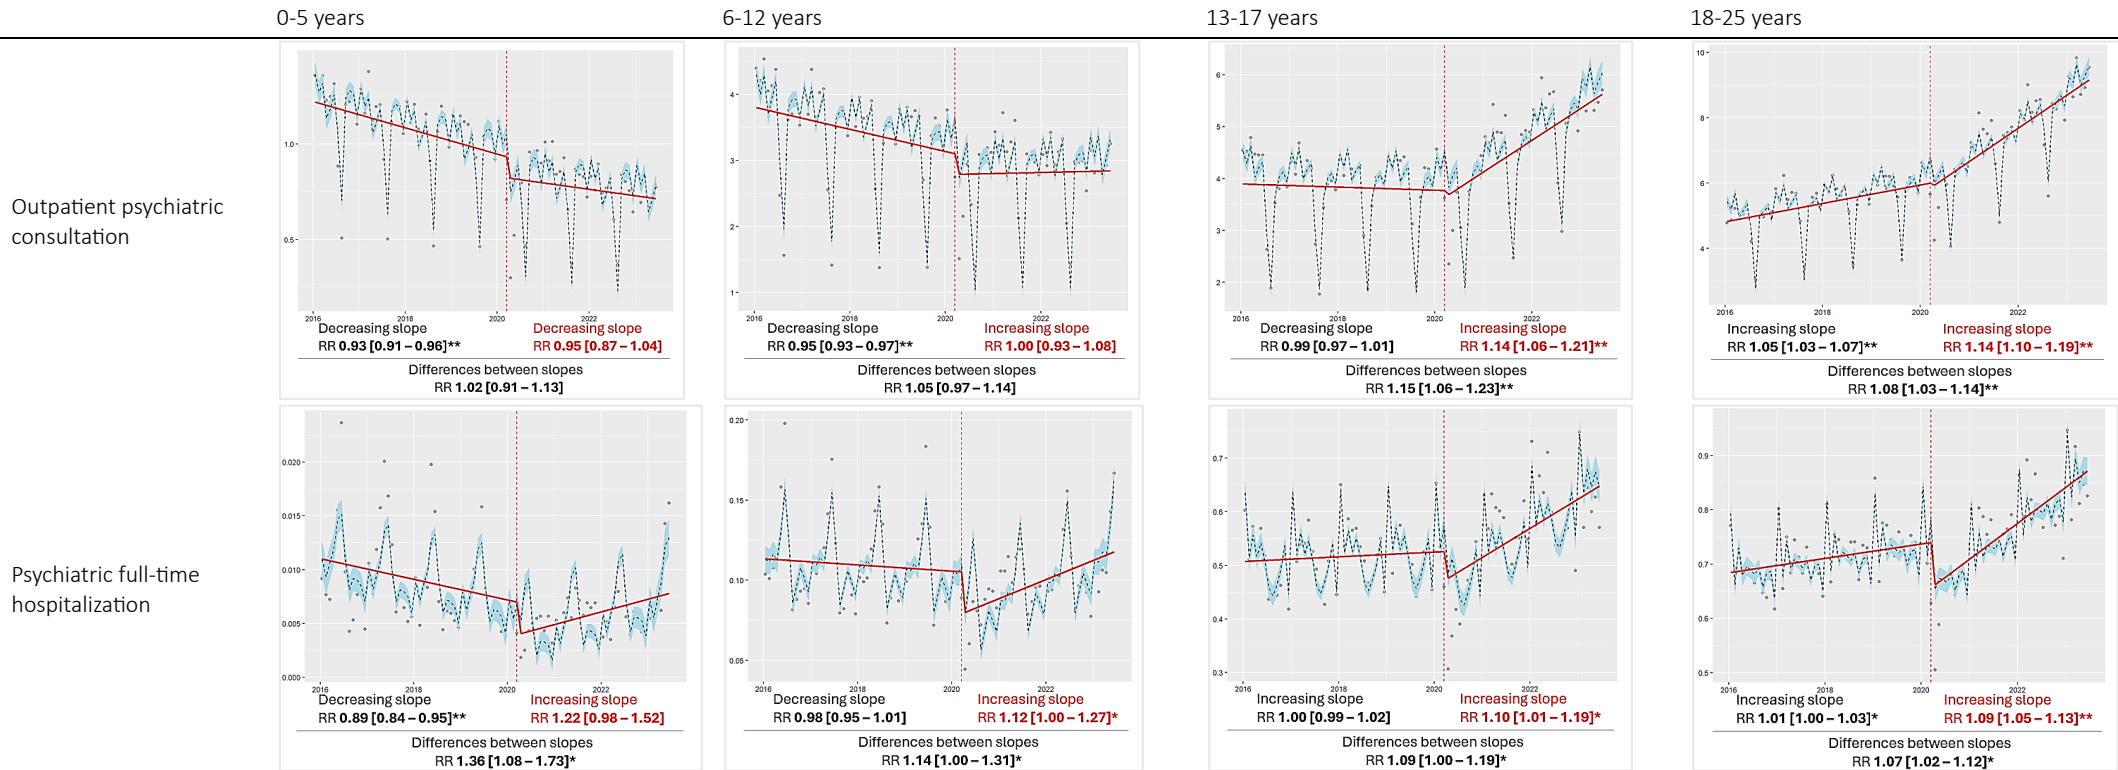

0-5 years

6-12 years

13-17 years

18-25 years

Hospitalization for suicide attempt

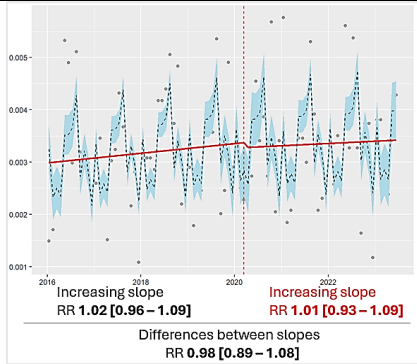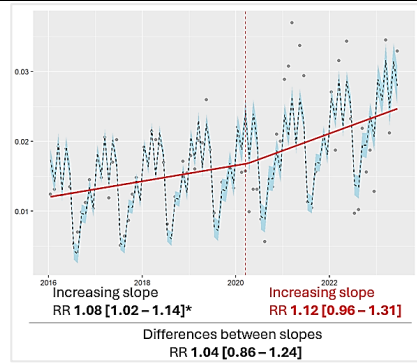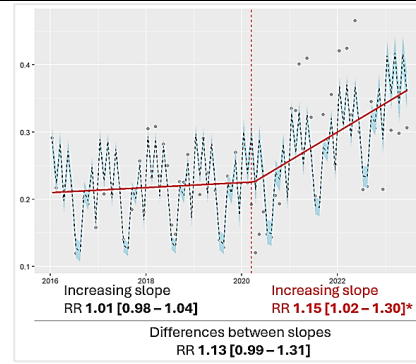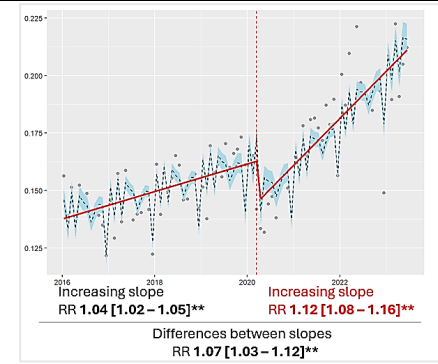

Antidepressants

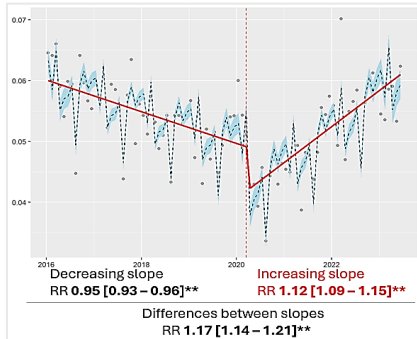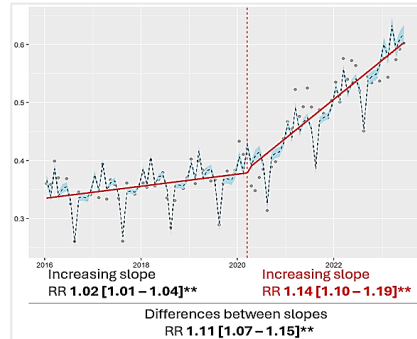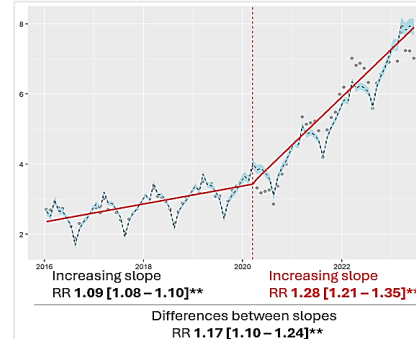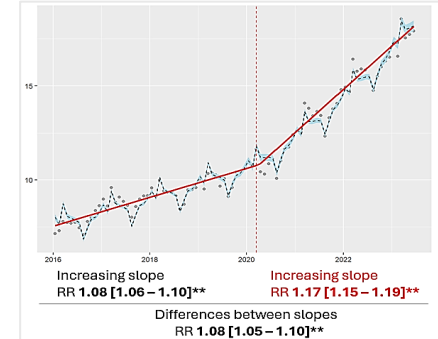

Anxiolytics

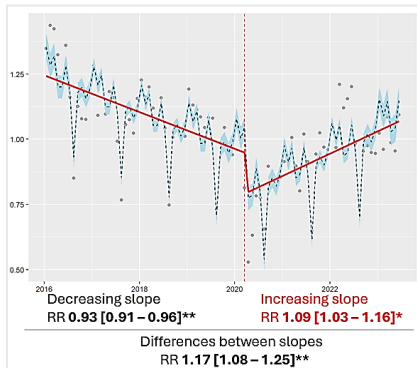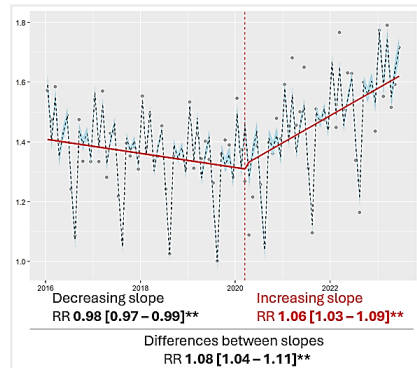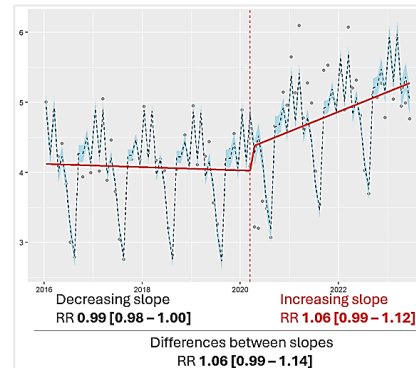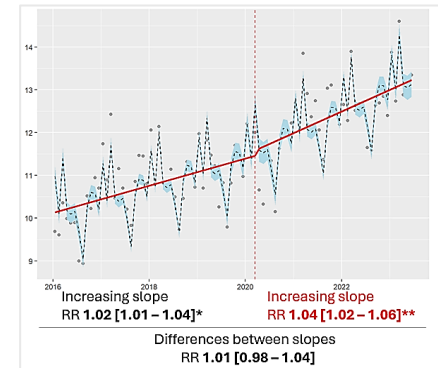

0-5 years

6-12 years

13-17 years

18-25 years

Hypnotics

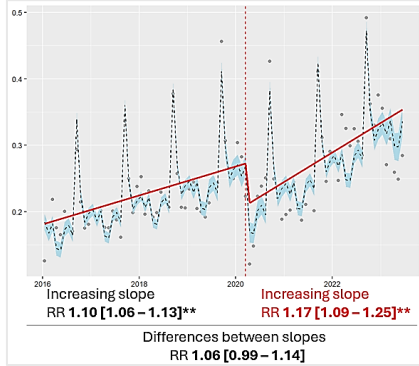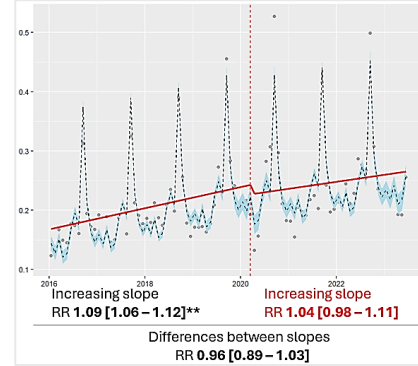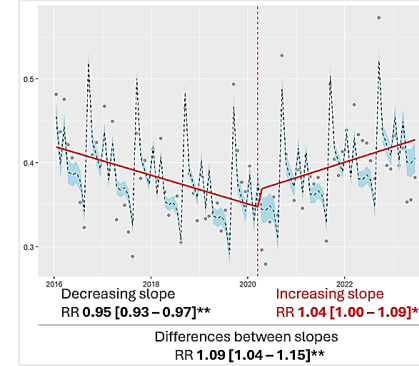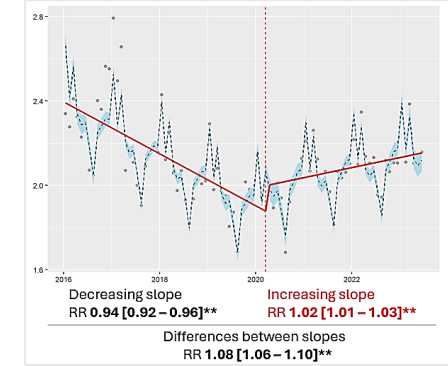

Mood stabilizers

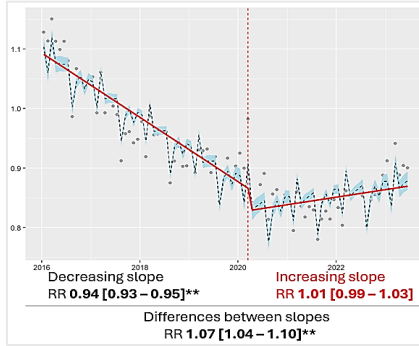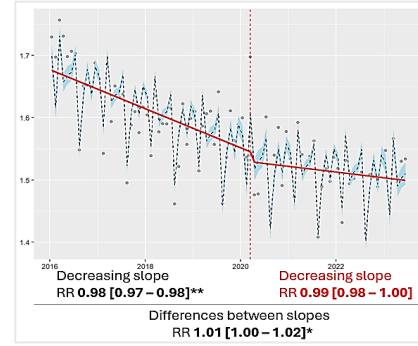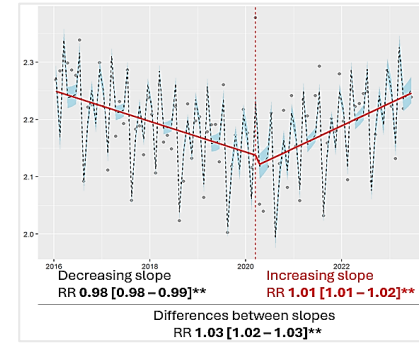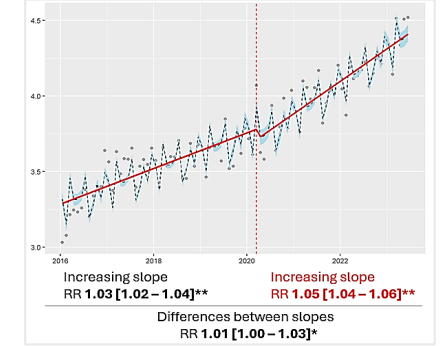

Antipsychotics

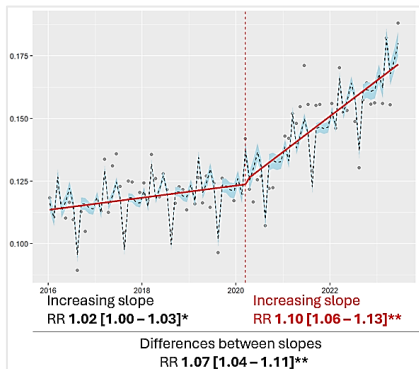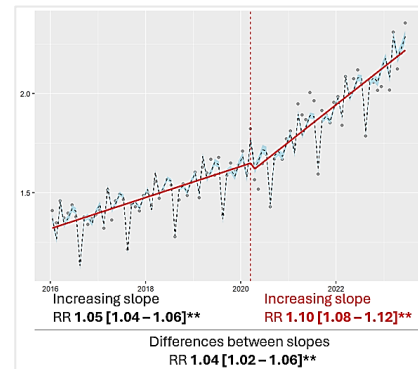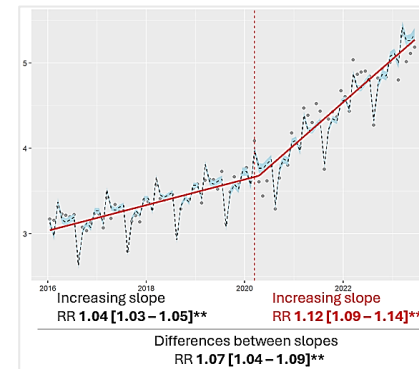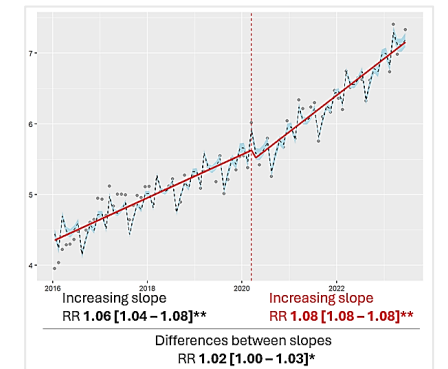

0-5 years

6-12 years

13-17 years

18-25 years

Methylphenidate

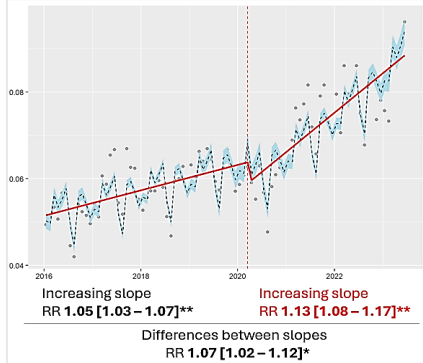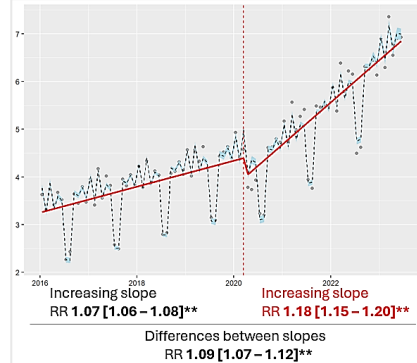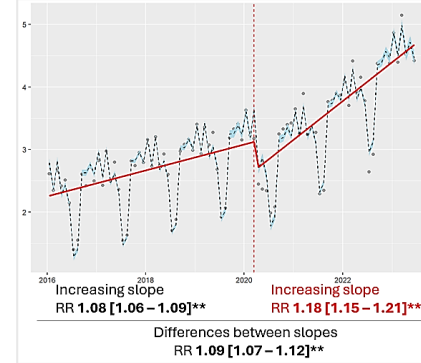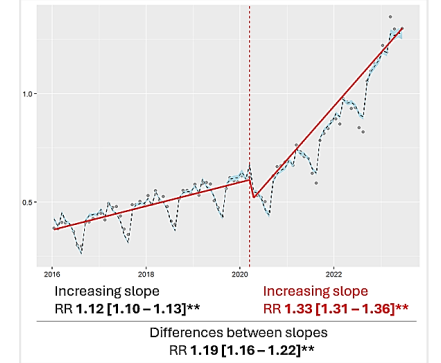

Medications used in alcohol dependence

NA

NA

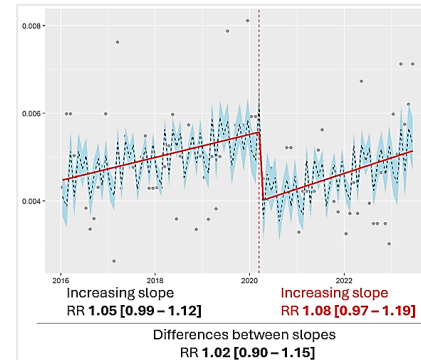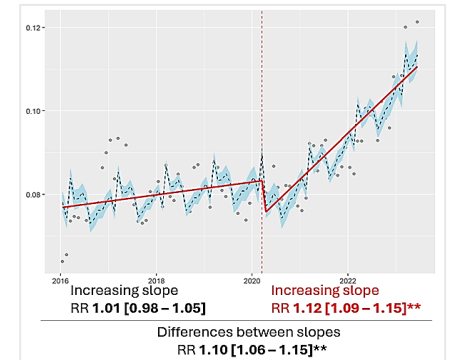

a:  $p < 0.05$

b:  $p < 0.001$

RR: relative risk.

Dotted lines are Quasi-Poisson estimates with confidence intervals. Dots are actual observations. The rates are expressed per 1,000 inhabitants.

NA: not applicable.
