# Supplementary material for: Mental Health Care Utilization and Prescription Rates Among Children, Adolescents, and Young Adults in France
Source: PubMed Central journal article supplement (PMC11707635; doi:10.1001/jamanetworkopen.2024.52789), 2025-01-07
Supplement: jamanetwopen-e2452789-s002.pdf [file jamanetwopen-e2452789-s002.pdf]

## Data Sharing Statement

Fond. Mental Health Care Utilization and Prescription Rates Among Children, Adolescents, and Young Adults in France. *JAMA Netw Open*. Published December 30, 2024.

doi:10.1001/jamanetworkopen.2024.52789

### Data

**Data available:** No

### Additional Information

**Explanation for why data not available:** national data from the French insurance database requiring an access code
